## Increased sensitivity to strong perturbations in a whole-brain model of LSD

Beatrice M. Jobst<sup>\*1</sup>, Selen Atasoy<sup>2,3</sup>, Adrián Ponce-Alvarez<sup>1</sup>, Ana Sanjuán<sup>1</sup>, Leor Roseman<sup>4</sup>, Mendel Kaelen<sup>4</sup>, Robin Carhat-Harris<sup>4</sup>, Morten L. Kringelbach<sup>2,3</sup>, Gustavo Deco<sup>1,5,6,7</sup>

1 Center for Brain and Cognition, Computational Neuroscience Group, Universitat Pompeu Fabra, Calle Ramón Trias Fargas 25-27, 08005 Barcelona, Spain.

2 Department of Psychiatry, University of Oxford, Oxford, UK.

3 Center of Music in the Brain (MIB), Clinical Medicine, Aarhus University, DK.

4 Centre for Psychedelic Research, Department of Brain Sciences, Imperial College London, United Kingdom.

5 Institució Catalana de la Recerca i Estudis Avançats (ICREA), Barcelona, Spain.

6 Department of Neuropsychology, Max Planck Institute for Human Cognitive and Brain Sciences, Leipzig, Germany

7 School of Psychological Sciences, Monash University, Clayton, Melbourne, Australia

### Corresponding author:

Beatrice M. Jobst, Universitat Pompeu Fabra, Calle Ramón Trias Fargas 25-27, 08005 Barcelona, Spain, E-Mail: [beatrice.jobst@upf.edu](mailto:beatrice.jobst@upf.edu), Tel.: +34 935422932, Fax: +34 935421702

## 1 **Abstract**

2 Lysergic acid diethylamide (LSD) is a potent psychedelic drug, which has seen a revival in clinical  
3 and pharmacological research within recent years. Human neuroimaging studies have shown  
4 fundamental changes in brain-wide functional connectivity and an expansion of dynamical brain  
5 states, thus raising the question about a mechanistic explanation of the dynamics underlying these  
6 alterations. Here, we applied a novel perturbational approach based on a whole-brain computational  
7 model, which opens up the possibility to externally perturb different brain regions in silico and  
8 investigate differences in dynamical stability of different brain states, i.e. the dynamical response of a  
9 certain brain region to an external perturbation. After adjusting the whole-brain model parameters to  
10 reflect the dynamics of functional magnetic resonance imaging (fMRI) BOLD signals recorded under  
11 the influence of LSD or placebo, perturbations of different brain areas were simulated by either  
12 promoting or disrupting synchronization in the regarding brain region. After perturbation offset, we  
13 quantified the recovery characteristics of the brain area to its basal dynamical state with the  
14 Perturbational Integration Latency Index (PILI) and used this measure to distinguish between the two  
15 brain states. We found significant changes in dynamical complexity with consistently higher PILI  
16 values after LSD intake on a global level, which indicates a shift of the brain's global working point  
17 further away from a stable equilibrium as compared to normal conditions. On a local level, we found  
18 that the largest differences were measured within the limbic network, the visual network and the  
19 default mode network. Additionally, we found a higher variability of PILI values across different brain  
20 regions after LSD intake, indicating higher response diversity under LSD after an external  
21 perturbation. Our results provide important new insights into the brain-wide dynamical changes  
22 underlying the psychedelic state - here provoked by LSD intake - and underline possible future clinical  
23 applications of psychedelic drugs in particular psychiatric disorders.

24

## 25 **Keywords**

26 Brain state, LSD, functional MRI, whole-brain modelling, perturbation, resting state networks

27

## 28 **Highlights**

- 29 • Novel offline perturbational method applied on functional magnetic resonance imaging  
30 (fMRI) data under the effect of lysergic acid diethylamide (LSD)
- 31 • Shift of brain's global working point to more complex dynamics after LSD intake
- 32 • Consistently longer recovery time after model perturbation under LSD influence
- 33 • Strongest effects in resting state networks relevant for psychedelic experience
- 34 • Higher response diversity across brain regions under LSD influence after an external in silico  
35 perturbation

## 36 1. Introduction

37 In the past few years, we have witnessed an increasing interest in the study of the effects of  
38 psychedelic drugs, including lysergic acid diethylamide (LSD), on the human brain. LSD is a potent  
39 psychoactive drug, which was first synthesized in 1938 and whose potent psychological effects were  
40 discovered in 1943<sup>1</sup>. Between the 1950s and the late 1960s LSD was widely used in psychology and  
41 psychotherapy and its clinical applications as a pharmacological substance were well studied<sup>2,3</sup>, for a  
42 recent review and meta-analysis see Fuentes et al<sup>4</sup>. Due to political reasons and its widespread  
43 uncontrolled recreational use, LSD was made illegal in the late 1960s, which explains the hiatus  
44 period in human research with LSD. It was not until recently that the drug has undergone a renaissance  
45 in clinical and brain research.

46  
47 Within the last few years, a significant number of human neuroimaging studies have been performed  
48 by only few research groups to identify neural correlates of the psychedelic state provoked by  
49 hallucinogenic drugs<sup>5-11</sup>. A non-exhaustive summary of these findings include: an increase in visual  
50 cortex blood flow and an expanded visual cortex functional connectivity<sup>6</sup>, a reduction of the integrity  
51 of functional brain networks<sup>6,8,11</sup>, a global increase in connectivity between networks<sup>6,8</sup>, where  
52 especially high-level association cortices comprising parts of the default-mode, salience, and  
53 frontoparietal attention networks and the thalamus showed increased global connectivity<sup>8</sup>, and an  
54 expanded repertoire of dynamical brain states, characterized by an increase of the variance of the  
55 Blood-Oxygen Level Dependent (BOLD) signal measured with functional Magnetic Resonance  
56 Imaging (fMRI) and a higher diversity of dynamic functional connectivity states<sup>7</sup>. While these results  
57 offer valuable insights into the major functional alterations taking effect in the brain during the  
58 psychedelic state, we do not yet have a compelling and complete mechanistic understanding of these  
59 effects in the context of whole-brain dynamics. To address this knowledge gap, we here apply a novel  
60 method combining a whole-brain computational model with an in silico model perturbation,  
61 previously described by Deco et al.<sup>12</sup>, which enables the simulation of external perturbations of any  
62 brain region for an unlimited amount of time in ways experimentally not possible.

63

64 In the last 15 years, there have been a number of studies investigating brain function by systematically  
65 exploring the dynamical responses to controlled artificial external perturbations of different brain  
66 regions and combining them with whole-brain neuroimaging<sup>13-18</sup>. There is a wide range of  
67 perturbation possibilities available, from easier to perform perturbation methods such as sensory  
68 stimulation and task instructions, to more invasive and costly methods, such as transcranial magnetic  
69 stimulation (TMS) in healthy human subjects to deep brain stimulation (DBS) in patients<sup>19-22</sup>. Also  
70 pharmacological studies inducing an anaesthetic state, which can also be considered as a perturbation  
71 to the brain, exist in human<sup>23</sup> as well as in the non-human primate<sup>24</sup> exploring the dynamic repertoires  
72 of the brain. The advantage of direct controlled artificial perturbations of specific brain regions is the  
73 systematic exploration of the provoked dynamical responses. These direct approaches have, however,  
74 been limited to transcranial magnetic stimulation (TMS) in healthy human subjects and to deep brain  
75 stimulation (DBS) in patients<sup>19-22</sup>.

76

77 Here we apply a novel in silico model perturbation approach to study the perturbation-elicited changes  
78 in global and local brain activity and to obtain a deeper understanding of the mechanisms underlying  
79 the experimentally observed dynamical brain changes under the influence of LSD in three different  
80 scanning conditions (rest, rest while listening to music and rest after listening to music). Previous  
81 studies have shown that the effects of LSD are amplified during listening of music<sup>9,25,26</sup>. Music is  
82 believed to act in combination with psychedelic drugs to enhance its emotional effects<sup>25</sup> and that it acts  
83 synergistically with the drug to intensify mental imagery and access to personal memories<sup>25,27,28</sup>. We  
84 used a computational whole-brain model, which directly simulates the resting state BOLD signal  
85 fluctuations<sup>12,18,29-31</sup> by simulating the dynamics in each brain area with the normal form of a  
86 supercritical Hopf bifurcation. This direct simulation of the resting state BOLD signal allows for  
87 systematical perturbation of each brain region in silico without needing to perturb the brain activity  
88 explicitly, e.g. via TMS. This whole-brain model based perturbation approach has proven useful to  
89 reveal the changes in brain dynamics underlying sleep, where brain activity was found to more rapidly

90 return to its original state after perturbation than during awake<sup>12</sup>. Taken together with previous  
91 experimental findings on LSD, we hypothesized that under the influence of LSD, the brain would take  
92 longer to return to baseline activity - meaning brain activity without the model based perturbation -  
93 after a strong simulated perturbation. Such a scenario would be consistent with more complex and less  
94 stable dynamics<sup>12,32</sup> as well as brain dynamics closer to bifurcation or critical regime<sup>6-8,33</sup>. Indeed,  
95 close to a bifurcation or instability, a dynamical system slows down its fluctuations and increases its  
96 responsiveness and complexity<sup>31,34</sup>. Whole-brain models have been shown to best represent the  
97 functional connectivity of whole-brain resting-state fMRI close to a bifurcation<sup>31,34</sup>. Previous research  
98 has suggested that LSD re-organizes brain dynamics at the edge of criticality<sup>33</sup>. Furthermore it has  
99 previously been shown that in an awake resting state - when compared to deep sleep - the brain takes  
100 longer to go back to its original state after perturbation<sup>12</sup>, and that perturbation induced stimuli  
101 propagate to other brain regions beyond the original stimulation site in an awake resting state as  
102 opposed to deep sleep<sup>13,15,35</sup>. Moreover, it has been shown that, while anesthesia reduces the  
103 complexity of brain signals with respect to normal wakefulness, LSD increases the activity complexity  
104 with respect to normal wakefulness, without a global loss of consciousness or changes in physiological  
105 arousal as seen in sleep or anaesthesia<sup>36</sup>. We thus hypothesized that LSD would produce more  
106 complex and sustained responses to perturbations than in normal resting-state conditions. We further  
107 expected this effect to be even stronger in the music condition, where the effects of LSD have been  
108 found to be amplified<sup>9,25,26</sup>.

109

## 110 2. Materials and Methods

### 111 2.1. Functional magnetic resonance imaging (fMRI) data

112 For the fMRI blood oxygen level dependent (BOLD) data, 20 healthy participants were scanned in 6  
113 different conditions: LSD resting state, placebo (PCB) resting state, LSD and PCB resting state while  
114 listening to music, LSD and PCB resting state after listening to music. LSD and PCB sessions were  
115 separated by at least 14 days with the condition order being balanced across participants, who were  
116 blind to this order. All participants gave informed consent. The experimental protocol was approved  
117 by the UK National Health Service research ethics committee, West-London. Experiments conformed  
118 with the revised declaration of Helsinki (2000), the International Committee on Harmonization Good  
119 Clinical Practice guidelines and the National Health Service Research Governance Framework. The  
120 data collection was sponsored by the Imperial College London, which was carried out under a Home  
121 Office license for research with schedule 1 drugs. Eight out of the 20 subjects were excluded from  
122 further analyses for the following reasons: the scanning session of one participant needed to be  
123 terminated early due to the subject reporting significant anxiety. Four participants were excluded due  
124 to high levels of head movement (as described in the original publication by Carhart-Harris<sup>6</sup>, the  
125 exclusion criterion for excessive head movement was subjects displaying more than 15% scrubbed  
126 volumes with a scrubbing threshold of  $FD = 0.5$ ). Three participants needed to be excluded due to  
127 technical problems with the sound delivery in the music condition. In total, 12 subjects were  
128 considered for further analyses. Each participant received either 75 g of LSD (intravenous, I.V.) or  
129 saline/placebo (I.V.) 70 minutes prior to MRI scanning. As described in the supplementary  
130 information of the original publication by Carhart-Harris et al<sup>6</sup> the participants reported noticing  
131 subjective drug effects between 5 to 15 minutes post-dosing. The drug effects reached peak intensity  
132 between 60 to 90 minutes post-dosing. The subsequent plateau of drug effects varied among  
133 individuals regarding their duration, but participants reported a general remaining of the drug effects  
134 for four hours post-dosing. MRI scanning started - as mentioned above - approximately 70 minutes  
135 post-dosing, and lasted for about 60 minutes. After each of the three scans, participants performed  
136 subjective ratings inside the scanner via a response box. The subjects who received saline/placebo

137 were considered as baseline MRI scans compared to the LSD scans. The BOLD fMRI data were  
138 recorded using a gradient echo planer imaging sequence, TR/TE = 2000/35ms, field of view = 220mm,  
139 64x64 acquisition matrix, parallel acceleration factor = 2, 90° flip angle. The exact length of each of  
140 the BOLD scans per participant was 7:20 minutes. As described in the original publication by Carhart-  
141 Harris<sup>6</sup>, the performed pre-processing steps were the following: 1) the first three volumes were  
142 removed; 2) de-spiking; 3) slice time correction; 4) motion correction by registering each volume to  
143 the volume most similar to all others regarding least squares; 5) brain extraction; 6) rigid body  
144 registration to anatomical scans; 7) non-linear registration to 2mm MNI brain; 8) scrubbing using an  
145 FD threshold of 0.4 (the mean percentage of volumes scrubbed for placebo and LSD was  $0.4 \pm 0.8\%$   
146 and  $1.7 \pm 2.3\%$ , respectively). The maximum number of scrubbed volumes per scan was 7.1% and  
147 scrubbed volumes were replaced with the mean of the surrounding volumes. Additional pre-processing  
148 steps were: 9) spatial smoothing of 6mm; 10) band-pass filtering between 0.01 to 0.08 Hz; 11) linear  
149 and quadratic de-trending; 12) regressing out 9 nuisance regressors (all nuisance regressors were  
150 bandpass filtered with the same filter as in step 10).

151 BOLD signals were averaged over cortical and sub-cortical regions of interest following the automated  
152 anatomical labeling (AAL) atlas parcellation of the brain into 90 regions of interest (76 cortical and 14  
153 subcortical regions, AAL90), comprising 45 regions in each hemisphere<sup>37</sup>. We chose this parcellation  
154 of the human brain, since especially for studying the spatiotemporal dynamics on a whole brain level,  
155 AAL seems to be particularly well fitted. It has been found to produce good results in the whole-brain  
156 literature in general<sup>12,38-40</sup> and furthermore whole brain computational models can be quite  
157 computationally expensive to perform and thus profit from a not too large number of parcels, as is the  
158 case in the AAL parcellation. The list of AAL ROIs can be found in the Supplementary Material  
159 (Supplementary Table S1).

160 The full details on the whole study design, the scanning protocol and further details on the fMRI pre-  
161 processing can be consulted in the supplementary information of the original publication<sup>6</sup>.

162

## 163 **2.2. Anatomical connectivity**



164 The anatomical connections between the different brain areas used in this study were obtained from  
165 Diffusion Tensor Imaging (DTI) data of an independent set of subjects, recorded in 16 healthy right-  
166 handed participants (11 men and 5 women, mean age:  $24.75 \pm 2.54$ ), recruited through the online  
167 recruitment system at Aarhus University. This data has already been described in previous studies<sup>29,41</sup>.  
168 Briefly, the automated anatomical labelling (AAL) template was used for the parcellation of the entire  
169 brain into 90 regions, as explained in the previous section. The brain parcellations were conducted in  
170 each individual's native space. The acquired DTI data was used to generate the structural connectivity  
171 (SC) maps for each participant. A three-step process was applied to construct these structural  
172 connectivity maps. First, the regions of the whole-brain network were defined with the AAL template  
173 as used in the functional MRI data. Secondly, probabilistic tractography was applied to estimate the  
174 connections between nodes in the whole-brain network (i.e. edges). Finally, the data was averaged  
175 across participants.

176

### 177 **2.3. Hopf computational whole-brain model**

178 The brain activity in each brain region was simulated with a computational whole-brain model, which  
179 has been previously described in various publications<sup>12,29,31,42</sup>. The model is based on the 90 coupled  
180 brain regions, comprising cortical and subcortical areas, retrieved from the AAL parcellation  
181 explained above. This computational model simulates the spontaneous brain activity in each node,  
182 which originates in the mutual interactions between anatomically connected brain areas (Fig. 1A). The  
183 anatomical connections are represented by the structural connectivity matrix  $C_{ij}$ , obtained through  
184 DTI based tractography, as explained above. The structural connectivity matrix was scaled to a  
185 maximum value of 0.2<sup>29,31</sup>, leading to a reduction of the parameter space to search for the optimal  
186 parameter. The dynamics in each brain area can be simulated by the normal form of a supercritical  
187 Hopf bifurcation, which can describe the transition from noise-induced oscillations to fully sustained  
188 oscillations<sup>31,43</sup>. In fact, it has been shown that by coupling the brain regions together using the  
189 underlying anatomical connections, the interactions between the local Hopf oscillators can describe  
190 electroencephalography (EEG)<sup>44</sup>, magnetoencephalography (MEG)<sup>41</sup> and fMRI dynamics<sup>12,29,31,42</sup>. The

191 dynamics of a given uncoupled node  $j$  are described by the following complex-valued equation,  
192 representing the normal form of a supercritical Hopf bifurcation:

193

$$194 \quad \frac{dz_j}{dt} = z(a + i\omega_j) - z|z_j|^2 + \beta\eta_j(t), \quad (1)$$

195

196 where  $z_j = \rho_j e^{i\theta_j} = x_j + iy_j$ ,  $\eta_j(t)$  is additive Gaussian noise,  $\beta = 0.04$  and  $\omega_j$  is the intrinsic  
197 node frequency, which was estimated as the peak frequency of the filtered BOLD time series for each  
198 brain region averaged over the participants within one subject group for each of the 6 conditions. This  
199 normal form possesses a supercritical Hopf bifurcation at  $a = 0$ . For  $a > 0$  the local dynamics settle  
200 into a stable limit cycle, producing self-sustained oscillations with frequency  $f_j = \frac{\omega_j}{2\pi}$ . For  $a < 0$  the  
201 damped oscillations lead the system to a stable fixed point (or focus), at  $z_j = 0$ , and, in the presence  
202 of noise, noise-induced oscillations are observed.

203 In order to simulate the whole-brain dynamics a coupling term was added which represents the input  
204 from node  $j$  to node  $i$  scaled by the structural connectivity matrix  $C_{ij}$ . Hence, the whole-brain  
205 dynamics are described by the following set of coupled equations:

206

$$207 \quad \frac{dz_j}{dt} = z(a + i\omega_j - |z|^2) + G \sum_{k=1}^N C_{jk}(z_k - z_j) + \beta\eta_j, \quad (2)$$

208

209 This model can be interpreted as an extension of the Kuramoto model<sup>30,45</sup> with amplitude variations,  
210 hence the choice of coupling  $(z_k - z_j)$ , which relates to a tendency of synchronization between two  
211 coupled nodes. For each node  $j$  the variable  $x_j = \text{Re}(z_j)$  simulates the fMRI BOLD signal using the  
212 Euler algorithm with a time step of  $0.1 \cdot \left(\frac{\text{TR}}{2}\right)$ . The parameter  $G$ , the global coupling strength, serves  
213 as a global coupling factor scaling equally the total input in each brain node.

214

#### 215 **2.4. Functional connectivity estimation**

216 The BOLD signal of each AAL region was detrended, demeaned and then band-pass filtered within  
217 the range of 0.04-0.07 Hz following Glerean et al.<sup>46</sup> individually for each subject. This frequency band  
218 has been shown to be less affected by noise and to be more functionally relevant compared with other  
219 frequency bands<sup>46-49</sup>. Next, the filtered time series were z-scored for each subject. The functional  
220 connectivity (FC) matrices were then calculated for each participant in each condition. Here we  
221 calculated the FC matrix as the Pearson correlations between the BOLD signals of all pairs of regions  
222 of interest (ROIs) over the whole recording duration. To obtain group-level FC matrices we applied  
223 fixed-effect analysis by Fisher's r-to-z transforming ( $z = \tanh(r)$ ) the correlation values before  
224 averaging over all participants within each condition and then back-transforming to correlation values.  
225 Thus, we obtained 6 final FC matrices, one for each condition. For the group level comparison, the FC  
226 matrices were averaged across subjects individually for each condition and the comparison was  
227 performed for each pair of LSD - PCB scanning condition (i.e. LSD vs. PCB in rest, rest with music  
228 and rest after music conditions, respectively). To test the significance of the differences of the  
229 conditions, we generated 100 surrogate datasets where the LSD and PCB conditions are randomly  
230 permuted with a 50% chance of switching of the condition assignment, following Jobst et al.<sup>29</sup>. In this  
231 way, the group pairs get randomly mixed and thus fulfil the null-hypothesis of no difference between  
232 drug-induced conditions.

233

234 In order to ensure that within the group PCB there would be no differences between FC matrices  
235 between the group of participants who received PCB in their first session and the group of participants  
236 who received PCB in their second session, we performed a similar statistical significance analysis as  
237 described above. We divided the PCB sessions in the aforementioned groups and generated again 100  
238 surrogate datasets where the group assignments are randomly permuted with a 50% chance of  
239 switching the group assignment. Thus, also here the null-hypothesis of no difference between the two  
240 groups is fulfilled and it can be analyzed if the differences of the mean FC matrices of the two groups

241 are significantly larger than the ones generated by the surrogate data. The results of this analysis are  
242 shown in the Supplementary Material (Supplementary Figure S1).

243 In line with this analysis we furthermore analyzed if the differences between the LSD and PCB states  
244 showed differences between the two groups mentioned above, those who received PCB in their first  
245 session (“First”) and those who received PCB in their second session (“Second”). We again divided  
246 the data into these two groups and now compared the LSD state to the PCB state within each group, as  
247 was done in the original FC matrix analysis described above. Then, we analyzed the differences  
248 between the two groups “First” and “Second” regarding the differences between LSD and PCB states,  
249 a difference of differences so to speak. In order to test for statistical significance we again constructed  
250 surrogate data in the same fashion as described above and tested for significance. The results of this  
251 analysis can be consulted in the Supplementary Material (Supplementary Figure S2).

252

## 253 **2.5. Drug state classification with Gaussian classifier**

254 To establish how specific each of the functional connectivity matrices is to the drug state (LSD or  
255 PCB), we classified the drug state based on the covariance of fMRI signals using a jackknife cross-  
256 validation approach, assuming that observations are drawn from a multivariate Gaussian distribution,  
257 following Jobst et al<sup>29</sup>. First, we estimated the covariance ( $\Sigma_{\text{LSD}}$  and  $\Sigma_{\text{PCB}}$ ) using the data of  $n-1$   
258 participants (train set), where  $n$  is the number of participants, for each drug state. Note, that in the  
259 Gaussian approximation the fMRI signals were fully determined by their covariance, since the data  
260 was z-scored and thus the mean of each fMRI time-series was zero. Then, we associated the data of  
261 the remaining subject (test set) to a drug state by selecting the zero-mean multivariate Gaussian  
262 process ( $N(0, \Sigma_{\text{LSD}})$  or  $N(0, \Sigma_{\text{PCB}})$ ) which maximises the log-likelihood of the test data given the  
263 trained model. We calculated the percentage of correct classifications across both states and the  $n$   
264 participants. Given the zero-mean multivariate Gaussian process  $N(0, \Sigma)$ , the likelihood of a test  $N$ -  
265 dimensional vector  $X_t$ , representing the  $t$ -th time step of the test data, is given by:

266

267 
$$P(X_t | \Sigma) = [2\pi \det(\Sigma)]^{-\frac{1}{2}} \exp\left(-\frac{1}{2} X_t^* \Sigma^{-1} X_t\right), \quad (3)$$

268

269 where  $\det(\Sigma)$  is the determinant of the covariance  $\Sigma$  and the superscript  $*$  represents the transpose.

270 The log-likelihood  $L$  of the entire test time series  $X = X_{1,\dots,T}$ , where  $T$  is the number of time steps,

271 is given by (assuming independence of the observations):

272

273 
$$L(X | \Sigma) = \log \prod_{t=1}^T P(X_t | 0, \Sigma) = \sum_{t=1}^T \log P(X_t | \Sigma), \quad (4)$$

274

275 To summarize, we calculated  $L(X | \Sigma_{\text{LSD}})$  and  $L(X | \Sigma_{\text{PCB}})$  for each test dataset  $X$ . We predicted

276 the state LSD if  $L(X | \Sigma_{\text{LSD}}) > L(X | \Sigma_{\text{PCB}})$ , otherwise the predicted state was PCB.

277

278 To assess statistical significance of the classification performance we computed the probability of

279 obtaining  $k$  correct classifications by chance:  $\Pr(k) = C_n^k p^k (1-p)^{n-k}$ , where  $p$  is the probability

280 of getting a correct classification by chance  $\left(p = \frac{1}{2}\right)$  and  $n$  is the number of tests. Significant

281 decoding of the conditions was reached when the performance exceeded the 95th percentile of  $\Pr(k)$ .

282

## 283 **2.6. Fitting the model to experimental data**

284 We explored the parameter space of the whole-brain computational model by varying the global

285 coupling strength parameter  $G$  from 0 to 2 in steps of 0.01. To match the procedure applied on the

286 empirical data, we filtered the simulated BOLD time series as well in the range of 0.04-0.07 Hz.

287 Furthermore, the signal lengths of the simulated data coincided with the duration of the empirical data

288 recordings. Next, the FC matrix was estimated on the simulated data for the whole parameter space

289 applying the same procedure as on the empirical data. Then, the fitting between the empirical and the

290 simulated FC matrices was calculated for each condition (i.e. LSD during rest, rest with music and

291 rest after music and PCB during rest, rest with music and rest after music) for the whole parameter  
292 space using the Kolmogorov-Smirnov distance (KS distance) between the two matrices, yielding a  
293 measure of fit for each value of the parameter  $G$  for each condition. For each condition, 50 simulations  
294 of the BOLD time series were generated, and the KS-distance of fit was averaged across the 50  
295 simulations in order to minimize the random effects induced by the Gaussian noise in the model. We  
296 compared the resulting fitting curve minima with the surrogate data explained above in order to test  
297 for significant differences between the LSD and PCB conditions. The coupling parameter values,  
298 where the fitting curves were minimal, were then used for the following analysis steps.

299

### 300 **2.7. Model perturbation protocols**

301 Following Deco et al.<sup>12</sup> we made use of the locally defined bifurcation parameter  $a$  of the Hopf model  
302 to simulate two kinds of off-line perturbation protocols evoking either deviations from the basal state (  
303  $a = 0$ ) into the synchronous regime ( $a > 0$ ) or into the noisy regime ( $a < 0$ ). In order to investigate  
304 the local effects provoked by the perturbation of single brain areas, we perturbed each node  
305 individually, repeated the perturbation procedure 3000 times and performed statistical analyses using  
306 the error of the distribution averaged over the 3000 trials. One perturbation trial consisted in  
307 perturbing one out of 90 nodes for 100 seconds by setting its local bifurcation parameter value  $a$  to  
308 either  $a > 0$  or  $a < 0$ . Specifically, for the synchronization perturbation protocol  $a$  was set to 0.6 and  
309 for the noise perturbation protocol to -0.6. This leads to more oscillations in the perturbed node in the  
310 synchronization case and to an artificial destruction of the basal synchronization between the perturbed  
311 node and the other brain areas in the noise case. After perturbation, the bifurcation parameter was reset  
312 to zero in the perturbed node.

313

### 314 **2.8. Integration measure**

315 Next, in order to measure the level of brain-wide simulated BOLD signal interactions over time, we  
316 applied a measure previously defined in Deco et al.<sup>50</sup> and applied to fMRI data in Deco et al.<sup>12</sup>, which  
317 characterizes the level of integration across all brain regions for each time point.

318

319 First, the Hilbert transform was applied on the band-pass filtered simulated time series giving us the  
320 instantaneous signal phases  $\varphi_n(t)$ . Next, the phase locking matrix  $P$  was calculated which  
321 characterizes for each time point the pair-wise phase synchronization between two brain regions  $p$  and  
322  $q$ :

323

$$324 \quad P_{pq}(t) = e^{-i|\varphi_p(t) - \varphi_q(t)|}, \quad (5)$$

325

326 where  $i$  is the imaginary unit (Fig. 1B). The level of integration at time  $t$  is then defined as the size of  
327 the largest connected component of the phase locking matrix averaged over thresholds<sup>12,50</sup>. We  
328 binarized the phase locking matrix  $P$  for 100 evenly spaced thresholds between 0 and 1, applying the  
329 criterion  $|P| < \theta = 0$  and 1 otherwise, and extracted for each of the thresholds the number of nodes of  
330 the largest connected component of  $P(t)$  at each time point  $t$ . We then calculated the integration  $I(t)$   
331 at time  $t$  as the integral of the curve of the largest component as a function of the thresholds (Fig. 1C).  
332 We computed the integration over 200 seconds of simulated BOLD time series in the basal state and  
333 starting at perturbation offset in the perturbed case.

334

### 335 **2.9. Perturbative Integration Latency Index (PILI)**

336 Following Deco et al.<sup>12</sup> we calculated the Perturbative Integration Latency Index (PILI) to characterize  
337 the return of the brain dynamics to the basal state after a model perturbation of the system (Fig. 1C).  
338 For this we used the changes of the level of integration over time from the perturbed state to the basal  
339 dynamics.

340

341 First, the integration was calculated for 200 seconds of the simulated basal state (blue curve in Fig.  
342 1C), averaged over 3000 trials and finally the maximum and minimum values of the averaged curve  
343 were identified. This was done for each of the 6 conditions. Then, the system was perturbed following

344 the procedure described above and again the integration was computed over 200 seconds after the  
345 offset of the perturbation. This procedure was performed 3000 times. The maximum and minimum  
346 values of the basal integration curve were used to determine the moment of recovery after the model  
347 perturbation, for the synchronization and noise protocol, respectively. Then, the PILI was calculated as  
348 the integral of the integration curve from perturbation offset to the reaching point of the basal state.  
349 Finally, we computed the average PILI over trials to obtain one final value for each brain area. The  
350 PILI reflects how strong the system reacts to a model perturbation and how long it takes for it to  
351 regain its basal dynamical state. The statistical significance tests were performed across the 3000 trials  
352 applying a Mann-Whitney U test to compare between LSD and PCB induced states.

353

## 354 **2.10. Region-wise and resting state network analysis**

355 The above described procedure resulted in one PILI for each of the 90 brain areas. We compared the  
356 p-values for all brain regions between LSD and PCB in each of the three scanning conditions (rest, rest  
357 with music, rest after music), computed with the above described statistical significance test, after  
358 ordering them from smallest to largest. Bonferroni correction was applied in order to correct for the  
359 multiple comparisons across the 90 brain areas.

360

361 Next, we evaluated the differences between PILI values in seven commonly observed resting state  
362 networks (RSNs): default mode network (DMN), executive control, dorsal attention, ventral attention,  
363 visual, limbic and somato-motor networks, as described in Yeo et al.<sup>51</sup>. The parcellation of the cerebral  
364 cortex into these 7 networks has been extracted from the intrinsic functional connectivity data from a  
365 group of 1000 participants<sup>51</sup> and is available online at  
366 [http://surfer.nmr.mgh.harvard.edu/fswiki/CorticalParcellation\\_Yeo2011](http://surfer.nmr.mgh.harvard.edu/fswiki/CorticalParcellation_Yeo2011). For each of the 7 RSN<sup>51,52</sup>,  
367 we computed the standardized difference between the PILI values in the LSD and PCB induced states

368 by calculating Cohen's d-values, defined as  $\frac{\mu_{SD} - \mu_{PCB}}{\sqrt{\frac{\sigma_{LSD}^2 + \sigma_{PCB}^2}{2}}}$ , where  $\mu$  is the mean of the PILI values

369 and  $\sigma$  the standard deviation,<sup>53</sup> by taking into account only the brain areas belonging to that particular



370 RSN. The RSNs were then ordered from highest to lowest Cohen's d-value, where the higher the d-  
371 value, the higher the difference between PILI values and thus the larger the response to a model  
372 perturbation under the influence of LSD in one particular RSN. For completeness, we furthermore  
373 tested for statistical significance between the LSD and the PCB state models in each condition for each  
374 RSN by applying a Mann Whitney U test on the final PILI values of the brain areas belonging to each  
375 particular RSN. Bonferroni correction was applied to correct for the multiple comparisons across the 7  
376 RSNs.

377

### 378 **2.11. Response variability**

379 Finally, in order to learn more about the differences between the dynamics of individual brain regions,  
380 we calculated the variability of the PILI values over different brain regions. This was done by  
381 calculating the standard deviation of the PILI values across all brain nodes for each of the 3000 trials  
382 and then comparing the distributions over trials between LSD and PCB brain state model. We  
383 evaluated statistically significant differences between the LSD and PCB induced brain states by  
384 applying a two-sided t-test.

385

### 386 3. Results

387 We investigated the differences between LSD and PCB brain states in three different scanning  
388 conditions, namely LSD and PCB during rest, LSD and PCB during rest while listening to music and  
389 LSD and PCB during rest after listening to music. We applied a previously published off-line  
390 perturbational approach based on a whole-brain model, which characterizes the return of the brain  
391 dynamics to the basal state after a model perturbation of the system (see Fig. 1 for overview of the  
392 method).

393

#### 394 3.1. Functional connectivity and optimal working point

395 Firstly, we investigated the differences in functional connectivity (FC) between the LSD and PCB  
396 brain states in all three scanning conditions. For this, we calculated the FC matrices on a subject-level  
397 basis and averaged across subjects within each condition (see section 2. *Methods*). To compute the  
398 differences between the LSD and PCB states, the mean FC value was computed for each condition and  
399 then compared with the surrogate data. We found a significant difference in the mean FC values  
400 between LSD and PCB in the music condition (LSD:  $0.204 \pm 0.179$ , PCB:  $0.140 \pm 0.197$ ; p-value:  
401  $0.0297$ ). We also observed a slight increase in mean FC values during the LSD state with respect to  
402 PCB in resting conditions, which did not involve listening to music (rest: LSD:  $0.186 \pm 0.175$ , PCB:  
403  $0.154 \pm 0.202$ ; p-value:  $0.0990$ ; rest after music: LSD:  $0.181 \pm 0.171$ , PCB:  $0.163 \pm 0.191$ , p-value:  
404  $0.1485$ ). However, these differences were not found to be significant (Fig. 2A).

405

406 Next, we fitted the Hopf whole-brain model to the fMRI data in each condition in order to compare the  
407 effects of LSD and PCB with regards to their dynamical working point, i.e. the parameter region  
408 where the model best fits the data. The Hopf whole brain model has been previously shown to be able  
409 to simulate fMRI-BOLD network dynamics<sup>12,29,31,42</sup> and is especially well suited for simulating  
410 external perturbations to distinct brain nodes, as demonstrated in Deco et al.<sup>12</sup>. We computed the KS  
411 distance between the empirical and the simulated functional connectivity matrices and found a shift in  
412 the optimal global coupling parameter  $G$ , i.e. the minimal KS distance, towards higher values under

413 the influence of LSD in all three scanning conditions (rest: LSD: 0.31, PCB: 0.27; rest with music:  
414 LSD: 0.35, PCB: 0.25, rest after music: LSD: 0.29, PCB: 0.28) with a significant difference in the  
415 music condition ( $p = 0.0099$ ) (Fig. 2B). As above, to assess statistical significance, the values were  
416 compared with surrogate data obtained by randomly permuting group assignments (see section 2.  
417 *Methods*).

418  
419 To summarize, we found a global increase in functional connectivity and a shift of the optimal global  
420 coupling strength to larger values under the effect of LSD, implying a higher global level of brain  
421 connectivity in this state.

422

### 423 **3.2. Drug state classification with Gaussian classifier**

424 We assessed how specific the functional connectivity is to the drug state (LSD or PCB). The jackknife  
425 cross-validation procedure we applied consisted of: first, calculating the covariances on a subset of the  
426 data using N-1 participants, and then classifying the data of the remaining subject given the previously  
427 computed covariances (see *Methods*). We found that the drug states were predicted with an accuracy  
428 exceeding the significance level for all 3 scanning conditions (75% for rest, 79,17% for rest with  
429 music and 70,83% for rest after music) (Supplementary Figure S3). Importantly, these classification  
430 performances were significantly higher than expected by chance given the number of subjects. To  
431 summarize, the whole-brain covariance of single participants reliably relates to the drug state and thus  
432 even a small number of participants can be seen as representative of the two states LSD and PCB.

433

### 434 **3.3. Global differences in Integration**

435 Next, we simulated two kinds of model perturbation protocols for each brain state in order to compare  
436 the different state models with regard to their responses to a strong in silico perturbation. We  
437 compared the brain states by making use of the global integration measure (see section 2.7. *Integration*  
438 *measure*), which we used to evaluate the differences in integration.

439

440 With the adjustment of the whole-brain model to the fMRI data, we obtained a representative model of  
441 the basal brain state for LSD and PCB states in each condition. The two model perturbation protocols  
442 were then simulated by either shifting one brain node to a more synchronous state or to a noisier state  
443 for 100 s (see section 2.6. *Model perturbation protocols*). This was done for each of the 90 nodes  
444 representing the brain regions in the AAL parcellation. Immediately after perturbation, we quantified  
445 the perturbation-caused changes in brain-wide signal interactions over time by computing the global  
446 integration measure.

447

448 In Fig. 3, the integration averaged over 3000 trials and all 90 brain nodes is displayed as a function of  
449 time. The integration is shown immediately after perturbation offset for LSD and PCB state models in  
450 each condition. We observed that the basal integration was higher for each scanning condition in LSD  
451 (dark green curve) compared with PCB (light green curve), where the difference between LSD and  
452 PCB was highest in the music condition. This implies that without perturbation, the level of BOLD  
453 signal connectedness was higher in the LSD state than in PCB. Notably, comparison of the basal  
454 integration among scanning conditions (i.e. before, during and after music listening) within both the  
455 LSD and PCB state models also revealed that the basal integration increased under the influence of  
456 LSD while listening to music, whereas in the PCB state model it decreased with music. This finding is  
457 in line with previous results that have demonstrated an enhancement of the LSD experience while  
458 listening to music<sup>9,25,26</sup>, whilst in the PCB state, music appeared here to have a contrastive effect.  
459 These results call for further exploration of the differential effects of music on brain dynamics in the  
460 psychedelic state. Regarding the perturbation protocols, we found that for all three scanning  
461 conditions, the deviations from the basal activity were both stronger and longer-lasting under the  
462 influence of LSD (violet curve) in comparison with PCB (orange curve) after being exposed to the  
463 same kind of perturbation. While this is valid for both synchronization protocols and noise protocols,  
464 the effects on the differences in integration in the LSD state model as compared to the PCB state  
465 model were much smaller for the noise protocol than for the synchronization protocol (detailed  
466 analysis in *Methods - Global and local differences in Perturbative Integration Latency Index* and

467 Supplementary Information). We therefore decided to mainly focus on the synchronization protocol  
468 for the rest of the article. The results of the noise perturbation protocol can be consulted in the  
469 Supplementary Information.

470

### 471 **3.4. Global and local differences in Perturbative Integration Latency Index**

472 In order to formally characterize the above observed changes in Integration strength and the return  
473 duration of the brain dynamics to its basal state after a model perturbation, we computed the  
474 Perturbative Integration Latency Index (PILI). The PILI is defined as the area under the integration  
475 curve up to the point it reaches the basal state. Thus, the PILI captures both, strength of deviation from  
476 the basal state and duration of the recovery. The PILI was calculated for each node by only perturbing  
477 this specific node and leaving the other nodes at their basal dynamics for 3000 trials, which were then  
478 averaged in order to obtain one single PILI value for each brain area (see section 2.8. *Perturbative*  
479 *Integration Latency Index (PILI)*).

480

481 We found consistently higher PILI values for the LSD induced brain state model than for PCB in all  
482 three scanning conditions, where the effect was strongest for the music condition (Fig. 4). Again, the  
483 effect was diminished in the rest after music condition, which is most likely due to the decreased effect  
484 of LSD, as explained above. Most importantly, we demonstrate here, that the LSD and PCB brain  
485 states show very different dynamical responses to a model perturbation. In particular, the responses to  
486 the same perturbation are stronger and longer lasting under the influence of LSD with respect to PCB.  
487 Similar results were found for the noise protocol (Supplementary Figure S4). Also, here we observed a  
488 global increase in PILIs for LSD when compared to PCB for all three scanning conditions.

489

490 In order to prove that the higher PILI values not only depend on the stronger deviations from the  
491 baseline brain activity, but are indeed longer lasting under the influence of LSD when compared to  
492 PCB, we furthermore calculated the time for the perturbed signals to come back to the basal state. We  
493 found, by applying a Mann Whitney U test, that for the synchronization protocol in the first resting

494 state 88 out of 90 nodes showed significantly higher latencies in LSD when compared to PCB, in the  
495 Rest with Music condition 90 out of 90 nodes showed significantly higher latencies in the LSD state  
496 and in the Rest after Music condition 62 out of 90 nodes showed significantly higher latencies in the  
497 LSD state. This means that the perturbation effect is also longer lasting and not only stronger in the  
498 LSD state, where the effect is most prominent in the Music condition. The latencies for the 3 LSD  
499 conditions compared to the PCB conditions can be found in the Supplementary Material (Figure S5).

500

501 Next, to gain further insights into local processes, we looked at the PILI values on a node-to-node  
502 basis. We checked for statistical significance of the difference in the mean PILI value between LSD  
503 and PCB for each scanning condition for each node applying a Mann-Whitney U test with Bonferroni  
504 correction for multiple comparison across the number of brain nodes. The results for the  
505 synchronization protocol are shown in Table 1, where the 20 brain areas with the highest PILI  
506 differences are shown in order from smallest to largest p-value with their according effect sizes  
507  $r = z / \sqrt{N}$ , where  $N$  is the number of samples. Effect sizes between  $0.1 - < 0.3$  indicate small  
508 effects,  $0.3 - < 0.5$  medium effects and  $\geq 0.5$  large effects. The ordering of the rest of the brain  
509 regions and the results for the noise protocol can be found in the Supplementary Material  
510 (Supplementary Tables S2 and S3).

| Rest              |           |             | Rest with Music      |            |             | Rest after Music     |           |             |
|-------------------|-----------|-------------|----------------------|------------|-------------|----------------------|-----------|-------------|
| Brain region      | p-value   | Effect Size | Brain region         | p-value    | Effect Size | Brain region         | p-value   | Effect Size |
| Olfactory R       | 2.99e-37* | 0.2328      | Cingulum Mid R       | 1.24e-172* | 0.5114      | Hippocampus R        | 1.63e-34* | 0.2237      |
| Thalamus L        | 2.70e-36* | 0.2297      | Precuneus L          | 2.21e-166* | 0.5019      | Cingulum Ant R       | 2.20e-21* | 0.1734      |
| Supp Motor Area R | 4.74e-35* | 0.2255      | Medial OFC R         | 2.93e-166* | 0.5017      | Precuneus R          | 4.97e-18* | 0.1580      |
| CingulumMid L     | 3.34e-33* | 0.2192      | Frontal Sup Medial R | 1.32e-159* | 0.4915      | Precentral R         | 4.12e-15* | 0.1433      |
| Calcarine L       | 1.41e-32* | 0.2170      | Frontal Sup Medial L | 3.68e-158* | 0.4892      | Hippocampus L        | 7.24e-12* | 0.1251      |
| Cingulum Ant R    | 1.80e-31* | 0.2131      | Frontal Sup R        | 9.98e-157* | 0.4870      | Supp Motor Area R    | 9.00e-12* | 0.1245      |
| Occipital Sup R   | 9.14e-30* | 0.2069      | Frontal Sup L        | 1.24e-156* | 0.4868      | Occipital Mid L      | 3.36e-11* | 0.1210      |
| Cingulum Post R   | 1.03e-29* | 0.2067      | Precuneus R          | 1.68e-154* | 0.4834      | Frontal Sup Medial R | 5.16e-11* | 0.1199      |
| Precuneus L       | 2.19e-29* | 0.2055      | Cingulum Post L      | 5.07e-151* | 0.4779      | Cingulum Mid L       | 6.66e-11* | 0.1192      |
| Medial OFC L      | 3.74e-29* | 0.2046      | Cingulum Mid L       | 4.49e-149* | 0.4748      | ParaHippocampal R    | 7.58e-11* | 0.1188      |
| Putamen L         | 4.22e-29* | 0.2044      | Cingulum Post R      | 6.79e-149* | 0.4745      | Medial OFC L         | 2.80e-10* | 0.1152      |
| Thalamus R        | 8.44e-29* | 0.2033      | Medial OFC L         | 2.74e-147* | 0.4719      | Cingulum Ant L       | 9.31e-10* | 0.1118      |
| Calcarine R       | 2.85e-28* | 0.2013      | Caudate L            | 2.64e-144* | 0.4670      | Frontal Sup R        | 3.58e-09* | 0.1078      |
| Putamen R         | 2.86e-28* | 0.2013      | Olfactory R          | 1.63e-139* | 0.4591      | Fusiform R           | 3.62e-09* | 0.1077      |

|                      |           |        |                   |            |        |                     |           |        |
|----------------------|-----------|--------|-------------------|------------|--------|---------------------|-----------|--------|
| Lingual L            | 3.52e-28* | 0.2010 | Frontal Sup Orb L | 1.26e-136* | 0.4542 | Cingulum Mid R      | 4.11e-09* | 0.1073 |
| Olfactory L          | 1.10e-27* | 0.1991 | MedialOFC R       | 1.22e-132* | 0.4474 | Calcarine R         | 4.54e-09* | 0.1070 |
| Precuneus R          | 1.12e-26* | 0.1952 | Cingulum Ant R    | 5.57e-132* | 0.4463 | Temporal Pole Sup L | 1.10e-08* | 0.1043 |
| Cingulum Post L      | 1.58e-26* | 0.1946 | Supp Motor Area R | 5.64e-131* | 0.4446 | Frontal Mid Orb L   | 1.55e-08* | 0.1033 |
| Frontal Sup Medial L | 3.00e-26* | 0.1935 | Cingulum Ant L    | 1.03e-130* | 0.4441 | Precuneus L         | 2.14e-08* | 0.1022 |
| Cingulum Ant L       | 3.87e-26* | 0.1931 | Frontal Sup Orb R | 5.13e-130* | 0.4429 | Temporal Inf L      | 3.25e-08* | 0.1009 |

511

512 \* statistically significant after Bonferroni correction

513 **Table 1: Node level PILI differences.** In this table brain nodes are ordered for each scanning condition by p-values - from smallest to largest -, based on the PILI  
514 differences between LSD and PCB by perturbing each specific node at a time. Here the 20 regions with the smallest p-values are shown with their corresponding  
515 effect sizes.



516 Ordering the brain regions by p-values of each scanning condition revealed that globally p-values were  
517 lower and effect sizes higher for the rest with music condition with respect to the other resting  
518 conditions, which confirms previous findings on the amplified effect of LSD while listening to  
519 music<sup>25,33</sup>. The brain regions with small p-values in all three scanning conditions, were the cingulate  
520 cortex, the precuneus, the medial OFC and the supplementary motor area. Other regions where high  
521 differences between LSD and PCB could be observed were the calcarine sulcus, the olfactory sulcus,  
522 the superior frontal gyrus and the medial frontal gyrus, thalamus and hippocampus.

523

524 Taken together, these results reveal that the dynamical responses of the brain as a whole to an external  
525 model perturbation are stronger and longer lasting under the influence of LSD when compared to  
526 PCB. Furthermore, this effect is amplified in the model estimated from data in which participants  
527 listen to music. Next, we performed the same analysis on a resting state network level, in order to  
528 assess whether some networks exhibit larger responses to external perturbations than others and more  
529 importantly, whether those networks coincide with the ones which have been reported to be relevant  
530 for the LSD experience.

531

### 532 **3.5. Relationship of PILI to resting state networks**

533 Next, we assessed the differences in PILI values based on the synchronization protocol in seven  
534 reference RSNs - default mode, executive control, dorsal attention, ventral attention, visual, limbic and  
535 somato-motor networks - by computing Cohen's d values, a standardized difference measure, between  
536 LSD and PCB PILI values for each RSN. Furthermore we tested for statistical significance of the  
537 differences between LSD and PCB state models for each RSN

538

539 The differences between LSD and PCB state models for all 7 RSNs in the resting state and music  
540 condition have been found to be statistically significant. In the rest after music condition 5 out of the 7  
541 networks don't survive the Bonferroni correction for multiple comparisons. The table of the  
542 corresponding p-values can be found in the Supplementary Material (Supplementary Table S4).

543 Notably, in all three scanning conditions, three RSNs were found to have the highest PILI differences  
544 between the LSD and PCB state models: i.e. the limbic, visual and default mode networks. The limbic  
545 network showed the highest differences in all three cases (see Fig. 5, where the RSNs were ordered for  
546 each of the three scanning conditions by Cohen's d values, darker colours indicate higher difference).  
547 In both of the no-music conditions, the visual network seemed to play an important role, whereas in  
548 the music condition the default mode network showed higher differences in PILI values than the visual  
549 network. In the resting state conditions, the somato-motor network came fourth to the first three RSNs  
550 by Cohen's d values, whilst in the music condition, the ventral attention network gained more  
551 importance.

552 Overall, these results highlight that in particular three resting state networks, limbic, visual and default  
553 mode, show highly increased sensitivity under the influence of LSD, in line with previous studies<sup>6,8</sup>.  
554 Importantly, our findings propose a mechanistic explanation for the enhanced emotional, visual and  
555 self-referential processing due to increased sensitivity of the limbic, visual and default mode networks,  
556 respectively, in the psychedelic state.

557

### 558 **3.6. Increased perturbation response variability in LSD condition**

559 Finally, we analyzed the perturbation response variability across all brain regions. This was done by  
560 computing the standard deviation of the PILI values over brain nodes. In Fig. 6 we show the  
561 distribution over the 3000 trials of the standard deviation for all three scanning conditions and both  
562 drug states for the synchronization protocol. We found that the differences in variability between LSD  
563 and PCB were highly significant ( $p < 0.0001$ ) in all three scanning conditions, with higher response  
564 variability under the influence of LSD than for PCB. This effect was strongest in the music condition  
565 and again less apparent in the after-music condition.

566

#### 567 **4. Discussion**

568 We applied a novel in silico model-based perturbational approach to analyze the perturbation-elicited  
569 changes in global and local brain activity under the influence of LSD compared with PCB in three  
570 consecutive scanning conditions, namely a resting state followed by resting while listening to music  
571 and finally a post-music resting state. Besides finding an increase in global functional connectivity and  
572 a shift of the brain's global working point to higher connectivity in the LSD state, we showed that  
573 under the influence of LSD, brain dynamics show a larger divergence from and take longer to return to  
574 baseline activity after a strong model perturbation compared with the PCB state. Although we found  
575 that this effect was global on the whole cortex, our findings also revealed that certain brain regions and  
576 networks, such as the limbic network, the visual network, and the default mode network, were most  
577 sensitive to these changes. Finally, we also evaluated the differences between LSD and PCB with  
578 regard to the variability of these perturbational responses and found higher response variability under  
579 the influence of LSD.

580

581 We found that the empirical functional connectivity was higher on average in the LSD condition  
582 compared with the PCB condition, and this difference was especially pronounced in the music  
583 condition (Fig. 2A), where the effects of LSD seem to be amplified - as reported in the literature<sup>9,25,26</sup>.  
584 This finding consolidates the results of previous studies, where it was found that high-level association  
585 cortices and the thalamus exhibit increased global functional connectivity under the influence of  
586 psychedelics<sup>8,54,55</sup>. At least two previous studies have found increased thalamic functional connectivity  
587 to various cortical regions<sup>54,55</sup> and another found a dramatic increase in functional connectivity  
588 between the primary visual cortex and other cortical areas under LSD -an effect that correlated  
589 strongly with ratings of enhanced visual imagery<sup>6</sup>. Similar results have been reported for other  
590 psychedelic drugs such as psilocybin (the main psychedelic component of magic mushrooms). One  
591 study found an expanded repertoire of dynamical brain states under the influence of psilocybin,  
592 characterized by an increase of the variance of the Blood-Oxygen Level Dependent (BOLD) signal  
593 measured with (fMRI) and a higher diversity of dynamic functional connectivity states<sup>7</sup>. In another

594 study psilocybin was found to have an increasing effect on DMN-Task-positive network (TPN)  
595 functional connectivity, thus underlining similarities of the psychedelic state to psychosis and  
596 meditative states, where the same effect has been found<sup>54</sup>. Yet another study by Roseman et al<sup>56</sup> found  
597 an increase in between-network functional connectivity under psilocybin, suggesting that the  
598 psychedelic state makes networks become less differentiated from each other. All these findings  
599 confirm our results of an increase of global functional connectivity.

600

601 Additionally to comparing the functional connectivity between LSD and PCB, we also assessed how  
602 specific the functional connectivity is to the drug state, meaning how well the functional connectivity  
603 of a single participant relates to either the LSD or the PCB state. We found that the brain states were  
604 predicted with an accuracy exceeding the significance level for all 3 scanning conditions (see  
605 Supplementary Figure S3). The finding that the FC matrices of single participants can be classified to  
606 the corresponding drug state with an accuracy higher than the chance level, implies that the  
607 characteristics of the single subjects are reflected in the group-level results. Importantly, these  
608 classification performances were significantly higher than expected by chance given the number of  
609 subjects. This suggests that also a small number of participants, as is the case in this study, and the  
610 characteristics of their fMRI recordings for each of the two drug states can be seen as a representative  
611 sample which can be used to draw general conclusions on a global level. Nevertheless, it would be  
612 undoubtedly advantageous to perform further similar experiments in the future with more participants  
613 involved.

614

615 In order to study the whole-brain dynamics underlying the psychedelic state, first, we applied a whole-  
616 brain model based on the normal form of a supercritical Hopf bifurcation simulating directly the fMRI  
617 BOLD responses. Our analyses revealed that the global working region of brain dynamics shifts to  
618 higher global coupling parameters in the LSD state when compared with PCB. Notably however,  
619 statistical significance was only reached in the music condition, implying that the differences in brain  
620 dynamics between the LSD and PCB state may be accentuated under conditions of significant

621 emotional evocation here represented by listening to music (Fig. 2B). This result underlines yet again  
622 the enhancing effect of music on the psychedelic state, as previously reported<sup>9,25,26</sup>. Taken together,  
623 our results suggest increased propagation of activity and enhanced communication between distinct  
624 brain regions. This finding is in agreement with previous studies that have demonstrated that the  
625 dynamical repertoire of the brain expands under the influence of psilocybin<sup>7</sup>, implying that, in this  
626 state, the brain operates in a different dynamic working region. Similar findings have also been  
627 recently demonstrated by Atasoy et al.<sup>33</sup>, where LSD was found to tune brain dynamics closer to  
628 criticality, entailing an increase in the diversity of the repertoire of brain states – a finding replicated  
629 more recently using both LSD and psilocybin data<sup>57</sup>. Increased brain criticality is consistent with the  
630 so-called entropic brain hypothesis<sup>58,59</sup> - and note the schematic figure 2 in Carhart-Harris et al.<sup>32</sup>.

631

632 In order to understand the optimal working point of brain dynamics in each scanning condition, we  
633 evaluated the responses to strong off-line model perturbations in each state. In a previous study<sup>12</sup>, this  
634 method was successfully used to discriminate between awake and sleep states. The importance of this  
635 new methodology lies in the fact that perturbations are exclusively applied in silico to a whole-brain  
636 computational model, allowing for stronger, longer lasting and brain node-specific perturbations in  
637 ways not possible experimentally. Furthermore, an important difference of this model-based  
638 perturbation approach to previously described perturbation procedures<sup>13,15,35</sup> is the fact that with this  
639 new approach, we measure the recovery characteristics of the system after the offset of the  
640 perturbation, not the dynamical reaction to the perturbation itself.

641

642 Following this approach, we characterized return to the basal brain activity by the Perturbative  
643 Integration Latency Index (PILI). Interestingly, we found differences in the global integration, even  
644 without applying any perturbation, where the basal integration was increased under LSD in contrast to  
645 PCB, which was again amplified in the music condition (Fig. 3). These findings indicate that the  
646 communication and interaction between distinct brain areas is enhanced under the influence of LSD, in  
647 line with the previous study of Tagliazucchi et al., where, amongst other findings, LSD was found to

648 increase global integration by enhancing the level of communication between normally distinct brain  
649 networks<sup>8</sup>. Similar effects could be observed with psilocybin<sup>56,60</sup>. Interestingly, we also observed an  
650 increase in the basal integration in the music condition under LSD, while music during PCB condition  
651 led to a slight decrease in the basal integration. This opposing effect of music in the LSD versus PCB  
652 conditions could be related to an accentuated psychological response to music under psychedelics, as  
653 observed more generally in the psychedelic research literature<sup>9,25,26</sup>. The effect of music on brain  
654 activity in the placebo condition appeared to be more consistent with a generic ‘focused’ brain  
655 response – as suggested by a decrease in brain-wide integration and a narrowing of the repertoire of  
656 activity<sup>61,62</sup>. Music could be characterized as a type of (felt) intrinsic perturbation under LSD but  
657 perhaps less so under placebo, where it is more likely to be witnessed more as an external object. That  
658 there was less of a difference between the LSD and placebo condition in the final resting state scan  
659 (post-music), could be due to a waning effect of the drug (i.e. a pharmacokinetic factor) - as described  
660 in the Materials and Methods section, the third and final fMRI session (rest after music) was more  
661 temporally distanced to the subjective peak effect of the drug than the first two sessions -, or a residual  
662 effect of having just listened to music, e.g. stabilising mind and brain dynamics under LSD, such that  
663 they differ less from those of the placebo condition. It would be useful to test these speculations in the  
664 future with more experiments.

665 It was evident that almost every node revealed a marked difference in PILI values under LSD versus  
666 placebo (see Supplementary Tables S2 and S3) – and this was evident across all three scanning  
667 conditions (rest, rest with music, rest after music). A higher PILI value indicates that the perturbed  
668 node shows increased sensitivity and stronger reaction to a model perturbation and requires longer  
669 recovery time to return to normal baseline activity. This suggests there is a diminished ability of the  
670 brain to homeostatically ‘right itself’ after perturbation under LSD. It is well established that slowness  
671 of recovery to perturbation is a key property of critical systems, where it is sometimes referred to in  
672 the literature as “critical slowing”<sup>63</sup>. That the brain should exhibit critical slowing under psychedelics  
673 was recently hypothesised in a narrative review on the effects of psychedelics on global brain function

674 (and note figure 2 in this article)<sup>32</sup>. The present findings therefore provide important empirical support  
675 for this principle.

676

677 Heightened sensitivity and the stronger reaction to a model perturbation in the LSD state models is  
678 also consistent with the work of Schartner et al.<sup>36</sup>, where elevated measures of MEG-recorded  
679 spontaneous or resting state brain complexity was found under psychedelics using an approach not  
680 unrelated to that of Massimini and colleagues<sup>13,15,64,65</sup>, who used TMS and complexity measures to  
681 characterise (diminished) states of consciousness. The here described effect of a simulated  
682 perturbation to LSD fMRI data could be regarded as a logical extension of these previous studies,  
683 where actual brain stimulation may be difficult to perform under a potent psychedelic. Moreover, the  
684 finding of elevated brain complexity is consistent with the finding of Schartner et al.<sup>36</sup>, Atasoy et al.<sup>33</sup>  
685 as well as the entropic brain hypothesis<sup>58,59</sup>, which stipulates that within reasonable bounds, the  
686 complexity or entropy of spontaneous activity indexes the richness of conscious experience, where  
687 greater ‘richness’ implies greater diversity and depth.

688

689 Analyzing the perturbation-elicited differences on a local node and network level (Fig. 4 and Table 1),  
690 we found that some brain regions and networks were more dominant regarding differences in PILI  
691 than others. For example, the limbic network yielded the highest perturbation-elicited differences  
692 between the LSD and the PCB state models indicating an enhanced sensitivity of this network under  
693 the effect of LSD. Within this network, the cingulate cortex showed a remarkably large sensitivity ( $p <$   
694  $10^{-8}$ , effect size: 0.51 in music condition). The cingulate cortex, and the limbic system more generally,  
695 are both implicated in emotional processing<sup>66</sup>. Moreover, they are both also implicated in the brain  
696 action of psychedelics<sup>67-70</sup>. Interestingly, limbic brain regions, especially the medial temporal lobe,  
697 have been associated with producing transient dreamlike states with visual hallucinations, similar to  
698 psychedelic-like phenomena, upon electrical depth stimulation<sup>71-74</sup>, also supporting the involvement of  
699 these brain regions in psychedelic visions. The here presented finding of enhanced sensitivity to a  
700 model perturbation of the limbic network supports the well known effect of LSD to facilitate

701 emotional arousal<sup>75</sup>. One could infer that heightened sensitivity of the limbic circuitry in particular is  
702 implicated in the heightened emotional responsivity that has been found in relation to psychedelic  
703 therapy<sup>25,76,77</sup>. The release of emotional content is thought to be a key aspect of the therapeutic action  
704 of psychedelic therapy<sup>75,76</sup>. Abnormal functioning of the limbic circuitry is well reported in mood  
705 disorders– and depression in particular<sup>78,79</sup> which has been the target of psychedelic therapy<sup>75,76</sup>.

706

707 Two other networks, the visual network and the default mode network (DMN), were strongly altered  
708 by LSD, consistent with previous studies reporting changes in the functioning of visual areas and in  
709 the functional properties of the DMN under LSD<sup>6,8</sup>. Consistent with this result, brain changes  
710 involving visual regions have been found to correlate with eyes-closed imagery under LSD<sup>6</sup>, while  
711 changes in DMN properties have been found to correlate with high-level characteristics of the  
712 experience, including ego dissolution<sup>8</sup>.

713

714 Finally, in order to understand the level of variation across brain nodes in the perturbation response,  
715 we analyzed the perturbation response variability by looking at the variance over nodes of the  
716 perturbation-elicited responses. Larger variance over brain nodes means higher heterogeneity across  
717 brain regions. A larger response variability signifies that each brain region is becoming more  
718 independent in its activity after a strong model perturbation. We found that the response variability  
719 was significantly higher in all three scanning conditions under LSD than PCB (Fig. 6), which indicates  
720 an enhanced diversity in brain dynamics, as also previously suggested for the LSD state<sup>33</sup>. This effect  
721 is consistent with what one would expect from a breakdown in the usual hierarchical constraints  
722 governing global brain function. Interestingly, abnormal hierarchical organization has previously been  
723 associated with neuropathological disorders such as depression, with changes in multimodal network  
724 organization<sup>80</sup> as well as psychosis and schizophrenia, with connectivity disturbances afflicting  
725 hierarchical brain organization<sup>80</sup> leading to attenuated top-down cognitive control<sup>81</sup>. Furthermore  
726 autism also has been found to relate to differences in this multimodal network hierarchy<sup>82</sup>. The  
727 relationship between hierarchical organization in the brain and criticality (including critical slowing)



728 was the focus of a recent major review on the acute and potential therapeutic action of psychedelics<sup>32</sup> –  
729 and flattened functional hierarchy in the brain has recently been observed in formal ‘gradient-based’  
730 analyses applied to the present dataset<sup>83</sup>.

731

732 The present study’s results suggest fundamental changes in brain dynamics and complexity under the  
733 influence of psychedelic drugs, consistent with the brain moving closer to a critical regime in which  
734 the brain is exquisitely sensitive to perturbation. These findings are therefore consistent with recent<sup>32</sup>  
735 and older theoretical models of the effects of psychedelics on global brain function<sup>59,84</sup>. They also bear  
736 significant relevance to principles of psychedelic psychotherapy, where great emphasis is placed on  
737 the importance of context, or ‘set and setting’, as a principal modulator of outcomes<sup>85</sup>. More plainly,  
738 the present findings of increased brain sensitivity to perturbation under LSD could be interpreted as  
739 related to evidence-based assumptions<sup>25</sup> about increased emotional sensitivity to environmental and  
740 other contextual factors (such as music) under psychedelics<sup>85</sup>.

741

742 The present version of the model allows us to understand how the global changes induced by LSD  
743 (i.e., global coupling) interact with the connectome and produce different network dynamics. The main  
744 limitation of the model is its homogeneity. In this model, all the brain regions were assumed to have  
745 the same intrinsic dynamics ( $a = 0$ ). Therefore, within this model, the differences in the dynamics of  
746 the brain regions were a consequence of the different effective connectivity of the regions. The model  
747 could be extended by introducing heterogeneity in local dynamics (i.e., by allowing the parameter  $a$  to  
748 vary between brain regions, thus requiring the estimation of  $N$  new model parameters). This extension  
749 might be useful to investigate local changes produced by LSD. A further limitation of the model is its  
750 limited frequency range. Since the model was constructed based on BOLD signals, it can only produce  
751 slow frequencies. Probing the model with MEG signals could provide insights on how LSD affects the  
752 different frequency bands of brain activity.

753

754

755 In summary, by exploring the underlying mechanistic properties of the whole-brain dynamics in the  
756 LSD state using a novel in silico perturbational approach, we have provided important new insights  
757 into global brain function underlying a possible altered state of consciousness that could bear  
758 relevance to our understanding of brain function and conscious states more generally. Importantly, the  
759 perturbational approach based on whole-brain modelling allows for the exploration of characteristic  
760 changes in whole-brain dynamics in ways that are extremely challenging to do via in vivo  
761 experiments. Furthermore, the here presented results enrich our understanding of how psychedelic  
762 drugs may have therapeutic utility and suggest future research directions, in which the neural  
763 mechanisms underlying their clinical use can be further explored.

764

765 **References**

- 766 1. Hofmann, A. *LSD —My problem child*. (McGraw-Hill, New York, 1980).
- 767 2. Passie, T., Halpern, J. H., Stichtenoth, D. O., Emrich, H. M. & Hintzen, A. The pharmacology  
768 of lysergic acid diethylamide: A review. *CNS Neurosci. Ther.* **14**, 295–314;  
769 DOI:10.1111/j.1755-5949.2008.00059.x (2008).
- 770 3. Nichols, D. E. Psychedelics. *Pharmacol. Rev.* **68**, 264–355; DOI:10.1124/pr.115.011478  
771 (2016).
- 772 4. Fuentes, J. J., Fonseca, F., Elices, M., Farré, M. & Torrens, M. Therapeutic Use of LSD in  
773 Psychiatry: A Systematic Review of Randomized-Controlled Clinical Trials. *Front. Psychiatry*  
774 **10**, 943; DOI:10.3389/fpsyt.2019.00943 (2020).
- 775 5. Carhart-Harris, R. L. *et al.* Neural correlates of the psychedelic state as determined by fMRI  
776 studies with psilocybin. *Proc. Natl. Acad. Sci.* **109**, 2138–2143;  
777 DOI:10.1073/pnas.1119598109 (2012).
- 778 6. Carhart-Harris, R. L. *et al.* Neural correlates of the LSD experience revealed by multimodal  
779 neuroimaging. *Proc. Natl. Acad. Sci.* **113**, 4853–4858; DOI:10.1073/pnas.1518377113 (2016).
- 780 7. Tagliazucchi, E., Carhart-Harris, R., Leech, R., Nutt, D. & Chialvo, D. R. Enhanced repertoire  
781 of brain dynamical states during the psychedelic experience. *Hum. Brain Mapp.* **35**, 5442–  
782 5456; DOI:10.1002/hbm.22562 (2014).
- 783 8. Tagliazucchi, E. *et al.* Increased Global Functional Connectivity Correlates with LSD-Induced  
784 Ego Dissolution. *Curr. Biol.* **26**, 1043–1050; DOI:10.1016/j.cub.2016.02.010 (2016).
- 785 9. Preller, K. H. *et al.* The Fabric of Meaning and Subjective Effects in LSD-Induced States  
786 Depend on Serotonin 2A Receptor Activation. *Curr. Biol.* **27**, 451–457;  
787 DOI:10.1016/j.cub.2016.12.030 (2017).
- 788 10. Muthukumaraswamy, S. D. *et al.* Broadband Cortical Desynchronization Underlies the Human  
789 Psychedelic State. *J. Neurosci.* **33**, 15171–15183; DOI:10.1523/JNEUROSCI.2063-13.2013  
790 (2013).
- 791 11. Palhano-Fontes, F. *et al.* The psychedelic state induced by Ayahuasca modulates the activity

- 792 and connectivity of the Default Mode Network. *PLoS One* **10**, e0118143;  
793 DOI:10.1371/journal.pone.0118143 (2015).
- 794 12. Deco, G. *et al.* Perturbation of whole-brain dynamics in silico reveals mechanistic differences  
795 between brain states. *Neuroimage* **169**, 46–56; DOI:10.1016/j.neuroimage.2017.12.009 (2018).
- 796 13. Massimini, M. *et al.* Breakdown of cortical effective connectivity during sleep. *Science* **309**,  
797 2228–2232; DOI:10.1126/science.1117256 (2005).
- 798 14. Litvak, V. *et al.* Artifact correction and source analysis of early electroencephalographic  
799 responses evoked by transcranial magnetic stimulation over primary motor cortex. *Neuroimage*  
800 **37**, 56–70; DOI:10.1016/j.neuroimage.2007.05.015 (2007).
- 801 15. Casali, A. G. *et al.* A theoretically based index of consciousness independent of sensory  
802 processing and behavior. *Sci. Transl. Med.* **5**, 198ra105; DOI:10.1126/scitranslmed.3006294  
803 (2013).
- 804 16. Kringelbach, M. L. *et al.* Deep brain stimulation for chronic pain investigated with  
805 magnetoencephalography. *Neuroreport* **18**, 223–228; DOI:10.1097/WNR.0b013e328010dc3d  
806 (2007).
- 807 17. Mohseni, H. R. *et al.* MEG can map short and long-term changes in brain activity following  
808 deep brain stimulation for chronic pain. *PLoS One* **7**, e37993;  
809 DOI:10.1371/journal.pone.0037993 (2012).
- 810 18. Saenger, V. M. *et al.* Uncovering the underlying mechanisms and whole-brain dynamics of  
811 deep brain stimulation for Parkinson’s disease. *Sci. Rep.* **7**, 9882; DOI:10.1038/s41598-017-  
812 10003-y (2017).
- 813 19. Kringelbach, M. L. & Aziz, T. Z. Neuroethical principles of deep-brain stimulation. *World*  
814 *Neurosurg.* **76**, 518–519; DOI:10.1016/j.wneu.2011.06.042 (2011).
- 815 20. Kringelbach, M. L., Jenkinson, N., Owen, S. L. F. & Aziz, T. Z. Translational principles of  
816 deep brain stimulation. *Nat. Rev. Neurosci.* **8**, 623–635; DOI:10.1038/nrn2196 (2007).
- 817 21. Clausen, J. Ethical brain stimulation - neuroethics of deep brain stimulation in research and  
818 clinical practice. *Eur. J. Neurosci.* **32**, 1152–1162; DOI:10.1111/j.1460-9568.2010.07421.x

- 819 (2010).
- 820 22. Siebner, H. R. *et al.* Consensus paper: Combining transcranial stimulation with neuroimaging.  
821 *Brain Stimul.* **2**, 58–80; DOI:10.1016/j.brs.2008.11.002 (2009).
- 822 23. Boveroux, P. *et al.* Breakdown of within- and between-network resting state functional  
823 magnetic resonance imaging connectivity during propofol-induced loss of consciousness.  
824 *Anesthesiology* **113**, 1038–1053; DOI:10.1097/ALN.0b013e3181f697f5 (2010).
- 825 24. Barttfeld, P. *et al.* Signature of consciousness in the dynamics of resting-state brain activity.  
826 *Proc. Natl. Acad. Sci.* **112**, 887–892; DOI:10.1073/pnas.1418031112 (2015).
- 827 25. Kaelen, M. *et al.* LSD enhances the emotional response to music. *Psychopharmacology (Berl).*  
828 **232**, 3607–3614; DOI:10.1007/s00213-015-4014-y (2015).
- 829 26. Kaelen, M. *et al.* LSD modulates music-induced imagery via changes in parahippocampal  
830 connectivity. *Eur. Neuropsychopharmacol.* **26**, 1099–1109;  
831 DOI:10.1016/j.euroneuro.2016.03.018 (2016).
- 832 27. Bonny, H. L. & Pahnke, W. N. The Use of Music in Psychedelic (LSD) Psychotherapy. *J.*  
833 *Music Ther.* **9**, 64–87; DOI:10.1093/jmt/9.2.64 (1972).
- 834 28. Grof, S. *LSD Psychotherapy.* (1980).
- 835 29. Jobst, B. M. *et al.* Increased Stability and Breakdown of Brain Effective Connectivity during  
836 Slow-Wave Sleep: Mechanistic Insights from Whole-Brain Computational Modelling. *Sci. Rep.*  
837 **7**, 4634; DOI:10.1038/s41598-017-04522-x (2017).
- 838 30. Ponce-Alvarez, A. *et al.* Resting-state temporal synchronization networks emerge from  
839 connectivity topology and heterogeneity. *PLoS Comput. Biol.* **11**, e1004100;  
840 DOI:10.1371/journal.pcbi.1004100 (2015).
- 841 31. Deco, G., Kringelbach, M. L., Jirsa, V. K. & Ritter, P. The dynamics of resting fluctuations in  
842 the brain: Metastability and its dynamical cortical core. *Sci. Rep.* **7**, 3095;  
843 DOI:10.1038/s41598-017-03073-5 (2017).
- 844 32. Carhart-Harris, R. L. & Friston, K. J. REBUS and the anarchic brain: Toward a unified model  
845 of the brain action of psychedelics. *Pharmacol. Rev.* **71**, 316–344; DOI:10.1124/pr.118.017160

- 846 (2019).
- 847 33. Atasoy, S. *et al.* Connectome-harmonic decomposition of human brain activity reveals  
848 dynamical repertoire re-organization under LSD. *Sci. Rep.* **7**, 17661; DOI:10.1038/s41598-017-  
849 17546-0 (2017).
- 850 34. Deco, G. *et al.* Resting-State Functional Connectivity Emerges from Structurally and  
851 Dynamically Shaped Slow Linear Fluctuations. *J. Neurosci.* **33**, 11239–11252;  
852 DOI:10.1523/JNEUROSCI.1091-13.2013 (2013).
- 853 35. Ferrarelli, F. *et al.* Breakdown in cortical effective connectivity during midazolam-induced loss  
854 of consciousness. *Proc. Natl. Acad. Sci.* **107**, 2681–2686; DOI:10.1073/pnas.0913008107  
855 (2010).
- 856 36. Schartner, M. M., Carhart-Harris, R. L., Barrett, A. B., Seth, A. K. & Muthukumaraswamy, S.  
857 D. Increased spontaneous MEG signal diversity for psychoactive doses of ketamine, LSD and  
858 psilocybin. *Sci. Rep.* **7**, 46421; DOI:10.1038/srep46421 (2017).
- 859 37. Dang-Vu, T. T. *et al.* Cerebral correlates of delta waves during non-REM sleep revisited.  
860 *Neuroimage* **28**, 14–21; DOI:10.1016/j.neuroimage.2005.05.028 (2005).
- 861 38. Cabral, J. *et al.* Exploring mechanisms of spontaneous functional connectivity in MEG: How  
862 delayed network interactions lead to structured amplitude envelopes of band-pass filtered  
863 oscillations. *Neuroimage* **90**, 423–435; DOI:10.1016/j.neuroimage.2013.11.047 (2014).
- 864 39. Cabral, J., Kringelbach, M. L. & Deco, G. Functional connectivity dynamically evolves on  
865 multiple time-scales over a static structural connectome: Models and mechanisms. *Neuroimage*  
866 **160**, 84–96; DOI:10.1016/J.NEUROIMAGE.2017.03.045 (2017).
- 867 40. Donnelly-Kehoe, P. *et al.* Reliable local dynamics in the brain across sessions are revealed by  
868 whole-brain modeling of resting state activity. *Hum. Brain Mapp.* **40**, 2967–2980;  
869 DOI:10.1002/hbm.24572 (2019).
- 870 41. Deco, G. *et al.* Single or multiple frequency generators in on-going brain activity: A  
871 mechanistic whole-brain model of empirical MEG data. *Neuroimage* **152**, 538–550;  
872 DOI:10.1016/j.neuroimage.2017.03.023 (2017).

- 873 42. Kringelbach, M. L., McIntosh, A. R., Ritter, P., Jirsa, V. K. & Deco, G. The Rediscovery of  
874 Slowness: Exploring the Timing of Cognition. *Trends Cogn. Sci.* **19**, 616–28;  
875 DOI:10.1016/j.tics.2015.07.011 (2015).
- 876 43. Kuznetsov, Y. A. *Elements of Applied Bifurcation Theory*. DOI:10.1007/b98848 (Springer:  
877 New York, 1998).
- 878 44. Freyer, F., Roberts, J. A., Ritter, P. & Breakspear, M. A Canonical Model of Multistability and  
879 Scale-Invariance in Biological Systems. *PLoS Comput. Biol.* **8**, e1002634;  
880 DOI:10.1371/journal.pcbi.1002634 (2012).
- 881 45. Strogatz, S. H. From Kuramoto to Crawford: exploring the onset of synchronization in  
882 populations of coupled oscillators. *Phys. D Nonlinear Phenom.* **143**, 1–20;  
883 DOI:10.1016/S0167-2789(00)00094-4 (2000).
- 884 46. Glerean, E., Salmi, J., Lahnakoski, J. M., Jääskeläinen, I. P. & Sams, M. Functional magnetic  
885 resonance imaging phase synchronization as a measure of dynamic functional connectivity.  
886 *Brain Connect.* **2**, 91–101; DOI:10.1089/brain.2011.0068 (2012).
- 887 47. Achard, S., Salvador, R., Whitcher, B., Suckling, J. & Bullmore, E. A resilient, low-frequency,  
888 small-world human brain functional network with highly connected association cortical hubs.  
889 *J. Neurosci.* **26**, 63–72; DOI:10.1523/JNEUROSCI.3874-05.2006 (2006).
- 890 48. Biswal, B., Yetkin, F. Z., Haughton, V. M. & Hyde, J. S. Functional connectivity in the motor  
891 cortex of resting human brain using echo-planar MRI. *Magn. Reson. Med.* **34**, 537–41; (1995).
- 892 49. Buckner, R. L. *et al.* Cortical hubs revealed by intrinsic functional connectivity: mapping,  
893 assessment of stability, and relation to Alzheimer’s disease. *J. Neurosci.* **29**, 1860–73;  
894 DOI:10.1523/JNEUROSCI.5062-08.2009 (2009).
- 895 50. Deco, G., Tononi, G., Boly, M. & Kringelbach, M. L. Rethinking segregation and integration:  
896 Contributions of whole-brain modelling. *Nat. Rev. Neurosci.* **16**, 430–439;  
897 DOI:10.1038/nrn3963 (2015).
- 898 51. Thomas Yeo, B. T. *et al.* The organization of the human cerebral cortex estimated by intrinsic  
899 functional connectivity. *J. Neurophysiol.* **106**, 1125–1165; DOI:10.1152/jn.00338.2011 (2011).

- 900 52. Atasoy, S., Donnelly, I. & Pearson, J. Human brain networks function in connectome-specific  
901 harmonic waves. *Nat. Commun.* **7**, 10340; DOI:10.1038/ncomms10340 (2016).
- 902 53. Cohen, J. *Statistical Power Analysis for the Behavioral Sciences*.  
903 DOI:10.4324/9780203771587 (Routledge, 1988).
- 904 54. Carhart-Harris, R. L. *et al.* Functional connectivity measures after psilocybin inform a novel  
905 hypothesis of early psychosis. *Schizophr. Bull.* **39**, 1343–1351; DOI:10.1093/schbul/sbs117  
906 (2013).
- 907 55. Müller, F. *et al.* Increased thalamic resting-state connectivity as a core driver of LSD-induced  
908 hallucinations. *Acta Psychiatr. Scand.* **136**, 648–657; DOI:10.1111/acps.12818 (2017).
- 909 56. Roseman, L., Leech, R., Feilding, A., Nutt, D. J. & Carhart-Harris, R. L. The effects of  
910 psilocybin and MDMA on between-network resting state functional connectivity in healthy  
911 volunteers. *Front. Hum. Neurosci.* **8**, 204; DOI:10.3389/fnhum.2014.00204 (2014).
- 912 57. Varley, T., Carhart-Harris, R., Roseman, L., Menon, D. K. & Stamatakis, E. Serotonergic  
913 Psychedelics LSD & Psilocybin Increase the Fractal Dimension of Cortical Brain Activity  
914 in Spatial and Temporal Domains. *bioRxiv* 517847; DOI:10.1101/517847 (2019).
- 915 58. Carhart-Harris, R. L. *et al.* The entropic brain: a theory of conscious states informed by  
916 neuroimaging research with psychedelic drugs. *Front. Hum. Neurosci.* **8**, 20;  
917 DOI:10.3389/fnhum.2014.00020 (2014).
- 918 59. Carhart-Harris, R. L. The entropic brain - revisited. *Neuropharmacology* **142**, 167–178;  
919 DOI:10.1016/j.neuropharm.2018.03.010 (2018).
- 920 60. Petri, G. *et al.* Homological scaffolds of brain functional networks. *J. R. Soc. Interface* **11**,  
921 20140873; DOI:10.1098/rsif.2014.0873 (2014).
- 922 61. Ponce-Alvarez, A., He, B. J., Hagmann, P. & Deco, G. Task-Driven Activity Reduces the  
923 Cortical Activity Space of the Brain: Experiment and Whole-Brain Modeling. *PLoS Comput.*  
924 *Biol.* **11**, e1004445; DOI:10.1371/journal.pcbi.1004445 (2015).
- 925 62. He, B. J. Spontaneous and Task-Evoked Brain Activity Negatively Interact. *J. Neurosci.* **33**,  
926 4672–4682; DOI:10.1523/JNEUROSCI.2922-12.2013 (2013).



- 927 63. Friston, K., Breakspear, M. & Deco, G. Perception and self-organized instability. *Front.*  
928 *Comput. Neurosci.* **6**, 44; DOI:10.3389/fncom.2012.00044 (2012).
- 929 64. Tononi, G., Boly, M., Massimini, M. & Koch, C. Integrated information theory: From  
930 consciousness to its physical substrate. *Nat. Rev. Neurosci.* **17**, 450–461;  
931 DOI:10.1038/nrn.2016.44 (2016).
- 932 65. Massimini, M., Boly, M., Casali, A., Rosanova, M. & Tononi, G. A perturbational approach for  
933 evaluating the brain’s capacity for consciousness. *Prog. Brain Res.* **177**, 201–214;  
934 DOI:10.1016/S0079-6123(09)17714-2 (2009).
- 935 66. Hadland, K. A., Rushworth, M. F. S., Gaffan, D. & Passingham, R. E. The effect of cingulate  
936 lesions on social behaviour and emotion. *Neuropsychologia* **41**, 919–931; DOI:10.1016/S0028-  
937 3932(02)00325-1 (2003).
- 938 67. Preller, K. H. *et al.* Effective connectivity changes in LSD-induced altered states of  
939 consciousness in humans. *Proc. Natl. Acad. Sci. U. S. A.* **116**, 2743–2748;  
940 DOI:10.1073/pnas.1815129116 (2019).
- 941 68. Müller, F., Dolder, P. C., Schmidt, A., Liechti, M. E. & Borgwardt, S. Altered network hub  
942 connectivity after acute LSD administration. *NeuroImage. Clin.* **18**, 694–701;  
943 DOI:10.1016/j.nicl.2018.03.005 (2018).
- 944 69. RajMohan, V. & Mohandas, E. The limbic system. *Indian J. Psychiatry* **49**, 132;  
945 DOI:10.4103/0019-5545.33264 (2007).
- 946 70. Morgane, P. J., Galler, J. R. & Mokler, D. J. A review of systems and networks of the limbic  
947 forebrain/limbic midbrain. *Prog. Neurobiol.* **75**, 143–160;  
948 DOI:10.1016/j.pneurobio.2005.01.001 (2005).
- 949 71. Herbet, G. *et al.* Disrupting posterior cingulate connectivity disconnects consciousness from  
950 the external environment. *Neuropsychologia* **56**, 239–244;  
951 DOI:10.1016/j.neuropsychologia.2014.01.020 (2014).
- 952 72. Carhart-Harris, R. & Nutt, D. Was it a vision or a waking dream? *Front. Psychol.* **5**, 255;  
953 DOI:10.3389/fpsyg.2014.00255 (2014).

- 954 73. Vignal, J.-P., Maillard, L., McGonigal, A. & Chauvel, P. The dreamy state: hallucinations of  
955 autobiographic memory evoked by temporal lobe stimulations and seizures. *Brain* **130**, 88–99;  
956 DOI:10.1093/brain/awl329 (2006).
- 957 74. Harris, R. C. Waves of the unconscious: The neurophysiology of dreamlike phenomena and its  
958 implications for the psychodynamic model of the mind. *Neuropsychoanalysis* **9**, 183–211;  
959 DOI:10.1080/15294145.2007.10773557 (2007).
- 960 75. Carhart-Harris, R. L. *et al.* The paradoxical psychological effects of lysergic acid diethylamide  
961 (LSD). *Psychol. Med.* **46**, 1379–1390; DOI:10.1017/S0033291715002901 (2016).
- 962 76. Roseman, L. *et al.* Emotional breakthrough and psychedelics: Validation of the Emotional  
963 Breakthrough Inventory. *J. Psychopharmacol.* **33**, 1076–1087;  
964 DOI:10.1177/0269881119855974 (2019).
- 965 77. Roseman, L., Demetriou, L., Wall, M. B., Nutt, D. J. & Carhart-Harris, R. L. Increased  
966 amygdala responses to emotional faces after psilocybin for treatment-resistant depression.  
967 *Neuropharmacology* **142**, 263–269; DOI:10.1016/j.neuropharm.2017.12.041 (2018).
- 968 78. Bennett, M. R. The prefrontal-limbic network in depression: Modulation by hypothalamus,  
969 basal ganglia and midbrain. *Prog. Neurobiol.* **93**, 468–487;  
970 DOI:10.1016/j.pneurobio.2011.01.006 (2011).
- 971 79. Pandya, M., Altinay, M., Malone, D. A. & Anand, A. Where in the brain is depression? *Curr.*  
972 *Psychiatry Rep.* **14**, 634–642; DOI:10.1007/s11920-012-0322-7 (2012).
- 973 80. Bassett, D. S. *et al.* Hierarchical Organization of Human Cortical Networks in Health and  
974 Schizophrenia. *J. Neurosci.* **28**, 9239–9248; DOI:10.1523/JNEUROSCI.1929-08.2008 (2008).
- 975 81. Peled, A. Multiple constraint organization in the brain: A theory for schizophrenia. *Brain Res.*  
976 *Bull.* **49**, 245–250; DOI:10.1016/S0361-9230(99)00048-9 (1999).
- 977 82. Hong, S.-J. *et al.* Atypical functional connectome hierarchy in autism. *Nat. Commun.* **10**, 1022;  
978 DOI:10.1038/s41467-019-08944-1 (2019).
- 979 83. Girn, M. *et al.* LSD flattens the functional hierarchy of the human brain. *bioRxiv*  
980 2020.05.01.072314; DOI:10.1101/2020.05.01.072314 (2020).

- 981 84. Carhart-Harris, R. L. *et al.* The entropic brain: a theory of conscious states informed by  
982 neuroimaging research with psychedelic drugs. *Front. Hum. Neurosci.* **8**, 20;  
983 DOI:10.3389/fnhum.2014.00020 (2014).
- 984 85. Carhart-Harris, R. L. *et al.* Psychedelics and the essential importance of context. *J.*  
985 *Psychopharmacol.* **32**, 725–731; DOI:10.1177/0269881118754710 (2018).
- 986

987 **Acknowledgements**

988 BMJ, AP-A, AS and GD are supported by AWAKENING Using whole-brain models perturbational  
989 approaches for predicting external stimulation to force transitions between different brain states (ref.  
990 PID2019-105772GB-I00, AEI FEDER EU), funded by the Spanish Ministry of Science, Innovation  
991 and Universities (MCIU), State Research Agency (AEI) and European Regional Development Funds  
992 (FEDER), the HBP SGA3 Human Brain Project Specific Grant Agreement 3 (Grant Agreement No.  
993 945539), funded by the EU H2020 FET Flagship program, the SGR Research Support Group support  
994 (ref. 2017 SGR 1545), funded by the Catalan Agency for Management of University and Research  
995 Grants (AGAUR), the SEMAINE ERA-Net NEURON Project, a Juan de la Cierva fellowship (IJCI-  
996 2014-21066) from the Spanish Ministry of Economy and Competitiveness, a Juan de la Cierva  
997 fellowship from the Spanish Ministry of Economy and Competitiveness (FPDI2013-17045), and by  
998 the FLAG-ERA JTC (PCI2018-092891).

999 RC-H is supported by the Alex Mosley Charitable Trust, Ad Astra Chandaria Foundation, Nikean  
1000 Foundation, Tim Ferriss, Alexander and Bohdana Tamas and Anton Bilton. SA and MLK are  
1001 supported by the ERC Consolidator Grant: CAREGIVING (n. 615539), Center for Music in the Brain,  
1002 funded by the Danish National Research Foundation (DNRF117), and Centre for Eudaimonia and  
1003 Human Flourishing funded by the Pettit and Carlsberg Foundations.

1004

1005 **Author contributions**

1006 BMJ and GD designed the study. BMJ, SA, AP-A and AS performed data analyses and numerical  
1007 simulations. LR, MK and RC-H conducted fMRI experiments, pre-processed and provided the data.  
1008 MLK provided the DTI data. BMJ wrote the first version of the manuscript. All authors contributed  
1009 significantly to the writing of the article and agreed to the final version.

1010

1011 **Conflict of interest**

1012 The authors declare no competing financial interests.

1013

1014 **Appendix A. Supplementary Information**

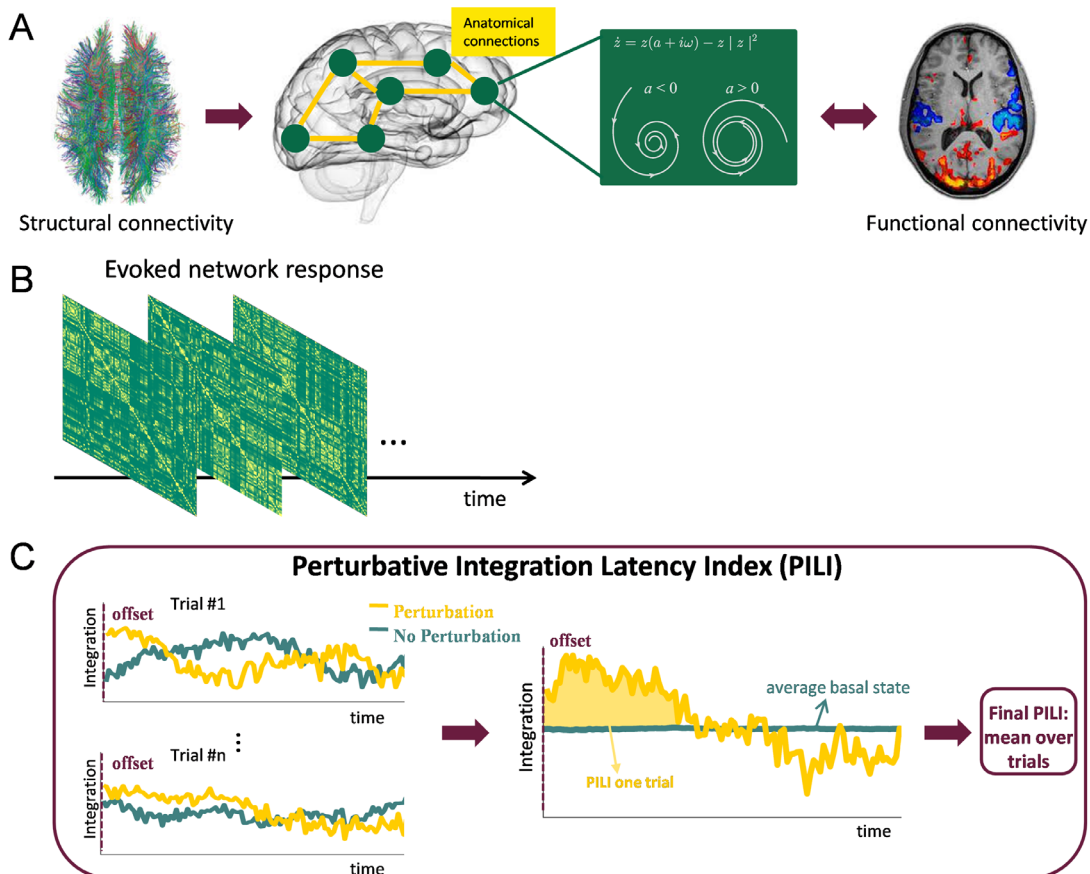

1015

1016

1017 **Figure 1: Calculation of the Perturbative Integration Latency Index (PILI).** A. Initially, the  
 1018 computational whole-brain model was built based on the empirical structural connections between the  
 1019 90 brain nodes. In this model each brain area was represented by a supercritical Hopf bifurcation. The  
 1020 model was fitted to the empirical functional connectivity in each of the 6 conditions, thus resulting in  
 1021 an optimal global coupling parameter for each condition. B. Next, we simulated the BOLD time series  
 1022 in each brain node for the basal dynamics and for the two perturbed states. The signals were band-pass  
 1023 filtered and Hilbert transformed to obtain the instantaneous phases and to subsequently calculate the  
 1024 phase locking matrix for each time point. C. Next, the integration was calculated as a function of time  
 1025 over 200 seconds in the basal state and after the offset of a model perturbation in either the  
 1026 synchronous or the noisy regime (here only shown the synchronous regime). The integration was  
 1027 computed by binarizing the phase locking matrix for different thresholds and calculating the number  
 1028 of areas in the largest connected component and finally integrating over thresholds. Finally the PILI

1029 was calculated, which characterizes the return of the brain dynamics to the basal state after a model  
1030 perturbation of the system. For each trial, the PILI was computed as the integral under the curve of  
1031 integration values after the offset of the model perturbation (yellow) until reaching the maximum of  
1032 the basal state (blue). The final PILI was obtained by averaging over trials. (see section 2. *Methods* for  
1033 detailed explanation).  
1034

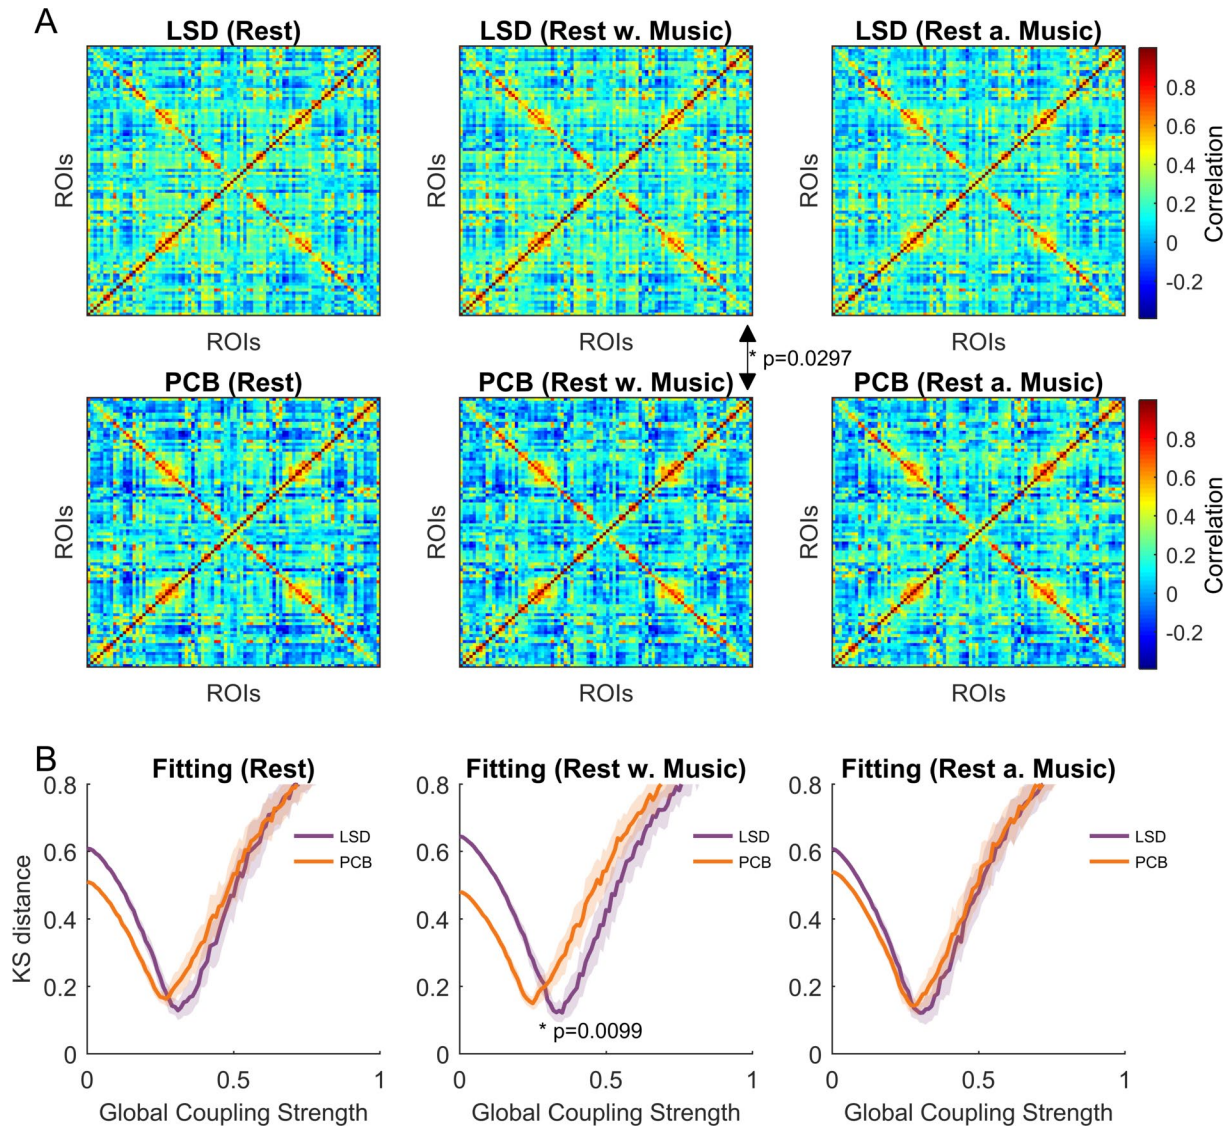

1035

1036

1037 **Figure 2: Empirical functional connectivity and model fitting.** In **A** the functional connectivity

1038 matrices are shown for each of the 6 conditions. Significance tests have been performed between the

1039 LSD and PCB conditions resulting in a significant difference in the mean functional connectivity

1040 between the LSD and the PCB state in the music scanning session. In **B** the mean and standard

1041 deviation over 50 realizations of the KS distance between the empirical and the simulated functional

1042 connectivity matrices are shown for each condition as a function of the global coupling strength. The

1043 optimal fit corresponds in each condition to the minimal KS distance. We found a significant

1044 difference between the optimal fit in the LSD and the PCB state in the music scanning session.

1045



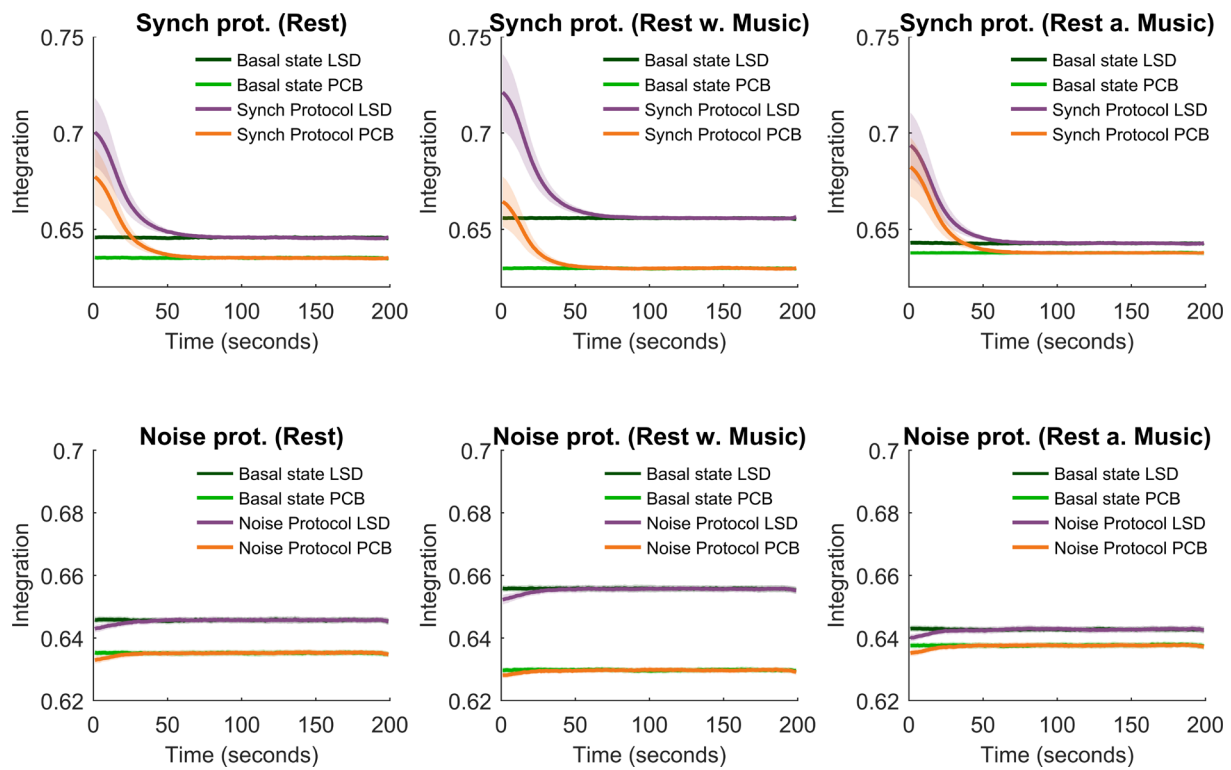

1046

1047

1048 **Figure 3: Mean integration.** The integration averaged over trials and nodes and the standard  
1049 deviation of the integration over nodes is shown as a function of time for the three scanning conditions  
1050 for both perturbation protocols. The mean and standard deviation of the integration are shown in dark  
1051 green and light green for the basal state of the LSD and the PCB state, respectively. The mean and  
1052 standard deviation of the integration are indicated in violet and orange and for the LSD and the PCB  
1053 state, respectively.

1054

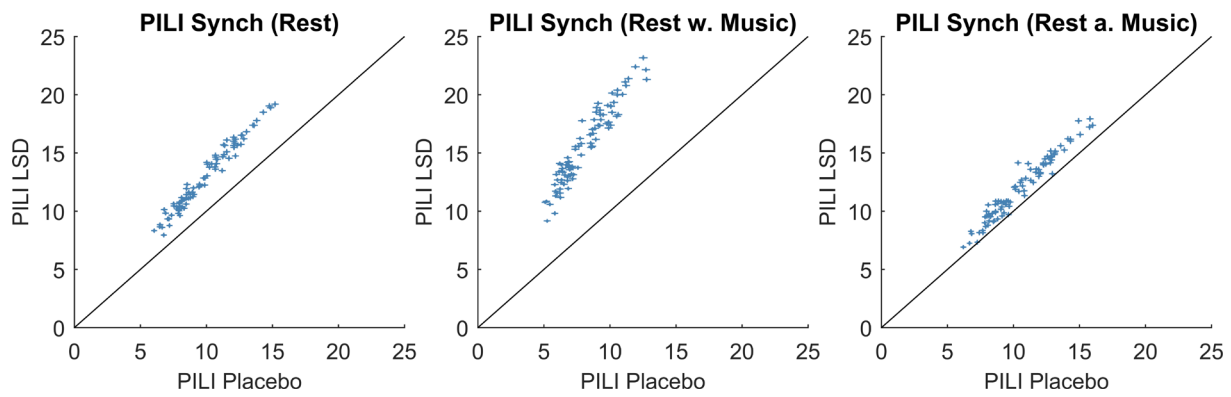

1055

1056

1057 **Figure 4: PILI - Node level analysis.** Here the mean and the standard error of the mean (SEM) of the  
1058 PILI values over trials are shown for each of the three scanning conditions for the LSD and the PCB  
1059 state for all 90 brain regions. The vertical error bars represent the SEM for the PCB state and  
1060 horizontal error bars represent the errors for the LSD state. The results show that the global differences  
1061 between the LSD and PCB induced brain states were amplified in the music condition. Node-by-node  
1062 analysis with corresponding p-values can be found in Table 1 and Supplementary Table S2.

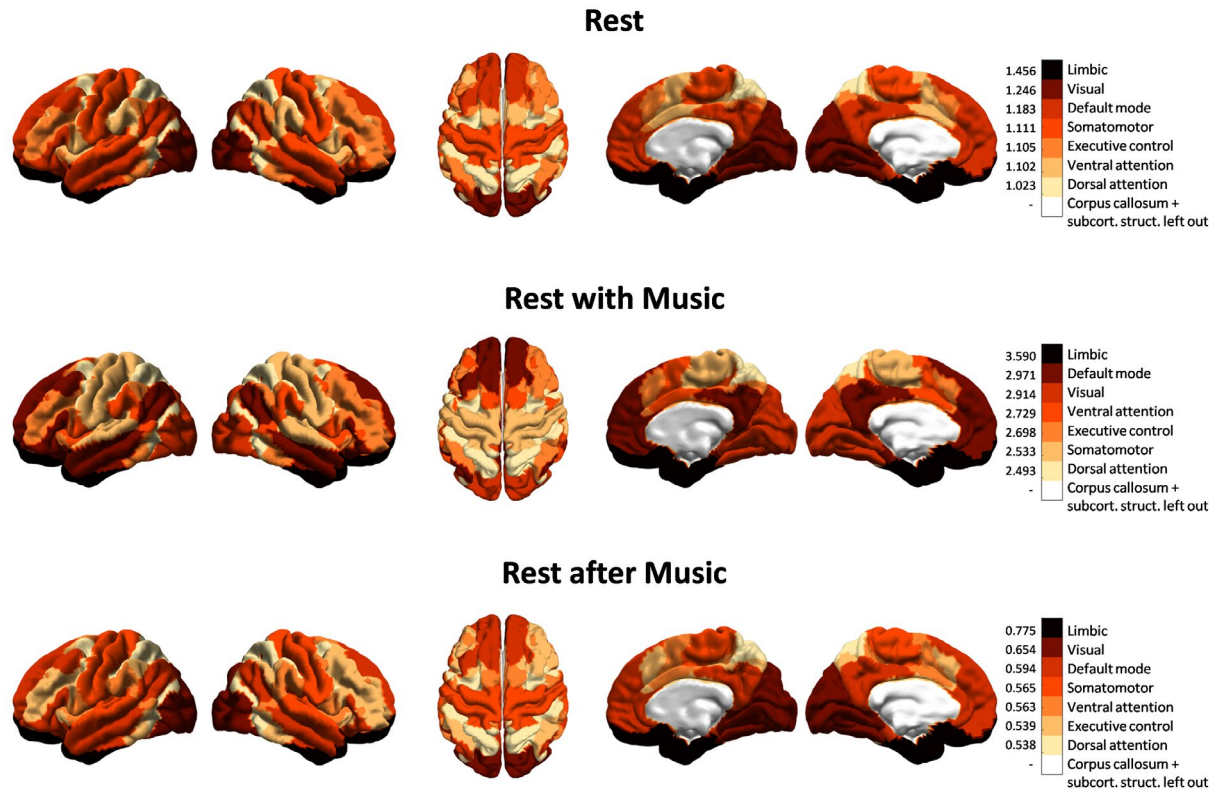

1063

1064 **Figure 5: PILI - RSN analysis.** The differences between the PILIs in LSD and PCB are shown on an  
1065 RSN level. For all the nodes forming part of one RSN the Cohen's d value was calculated based on the  
1066 mean and standard deviation over nodes in each state, indicating the standardized mean difference  
1067 between the PILIs of each RSN in LSD and PCB. This was done for each of the 7 RSNs. The RSNs  
1068 were ordered for each scanning condition (rest, rest with music, rest after music) by Cohen's d values,  
1069 where darker colours indicate larger differences in PILI between the LSD and PCB conditions. The  
1070 white area, which represents the corpus callosum and the subcortical structures, is to be discarded. It  
1071 should be noted that the differences between PILI values in LSD and PCB state models for each RSN  
1072 have found to be statistically significant in the rest and the rest with music condition. In the rest after  
1073 music condition only 2 out of 7 networks (limbic network and DMN) show statistically significant  
1074 differences (see Supplementary Table S4).

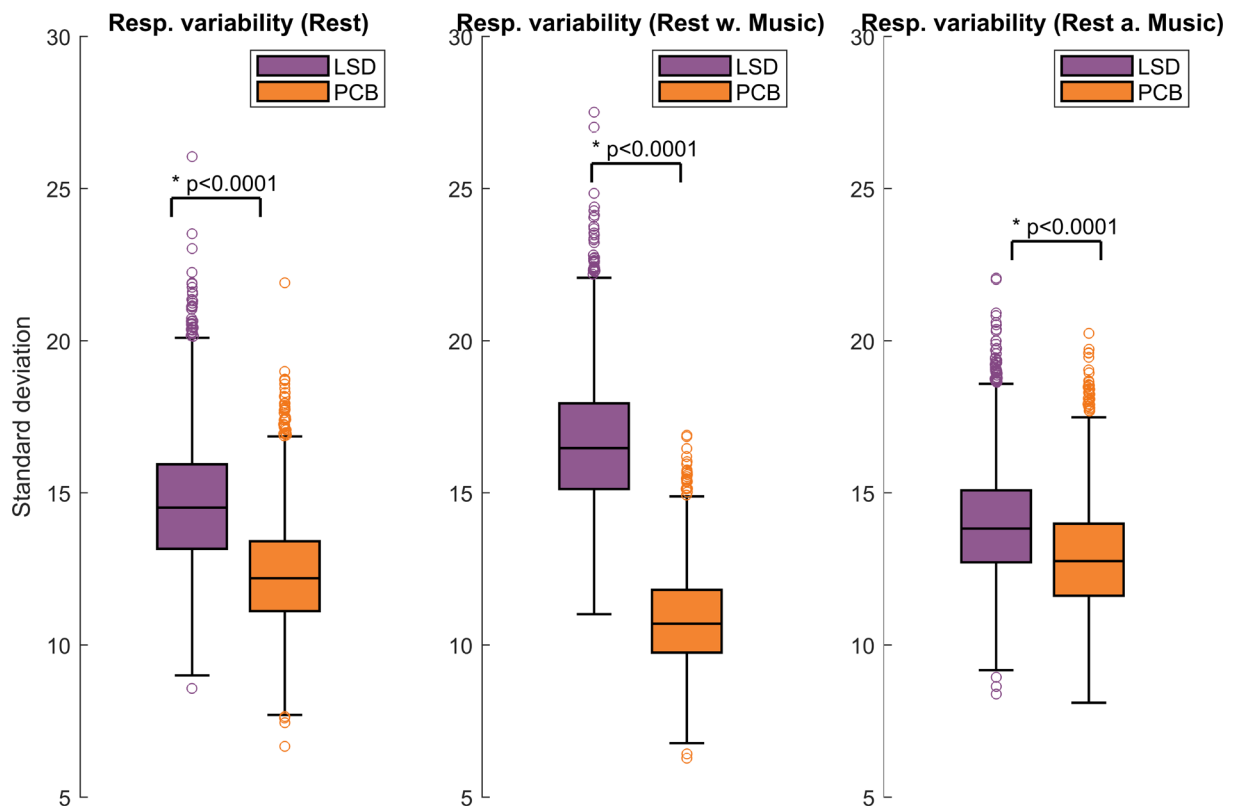

1075

1076

1077 **Figure 6: Response variability.** Here the distribution over trials of the standard deviation of PILI  
1078 values is shown for the three different scanning conditions for LSD and PCB. Statistical differences  
1079 between LSD and PCB brain states were evaluated with a two-sided t-test resulting in highly  
1080 significant differences in all three scanning conditions with significantly higher PILI variability in the  
1081 LSD state with respect to PCB. Especially in the music condition under the influence of LSD a  
1082 considerably larger response variability can be observed with a p-value significantly smaller than  
1083 0.0001.
